# Supplementary material for: A highly active zinc-based catalyst system for lactide homo- and copolymerization under industrially relevant conditions
Source: Royal Society of Chemistry journal article supplement (doi:10.1039/d4py01034e), 2024-01-01
Supplement: d4py01034e1.pdf [file d4py01034e1.pdf]

## A Highly Active Zinc-Based Catalyst System for Lactide Homo- and Copolymerization under Industrially Relevant Conditions

Zisheng Zhang,<sup>a</sup> Yi Zhou,<sup>a</sup> Shuang Liu,<sup>a</sup> Baixue Li,<sup>a,b</sup> Rui Qu,<sup>a,b</sup> Yanan Gu,<sup>a,b</sup> Hongyi Suo<sup>\*a,b</sup> and Yusheng Qin<sup>\*a,b</sup>

<sup>a</sup> School of Chemistry and Chemical Engineering, Yantai University, Yantai 264005, Shandong, China. E-mail: hysuo@ytu.edu.cn, ysqin@ytu.edu.cn

<sup>b</sup> Institute of Materials, Yantai University, Yantai 264005, Shandong, China.

### Content

|                                                                        |    |
|------------------------------------------------------------------------|----|
| 1 General Information & Methods.....                                   | 2  |
| 2 Procedural Information .....                                         | 3  |
| 2.1 Complex Synthesis.....                                             | 3  |
| 2.2 General Procedure for Homopolymerization of Lactones in Bulk ..... | 5  |
| 2.3 Homopolymerization of <i>rac</i> -LA in Solution .....             | 5  |
| 2.4 General Procedure for Copolymerization .....                       | 6  |
| 3 Ligand and Complex Characterization .....                            | 6  |
| 3.1 Ligand Characterization.....                                       | 6  |
| 3.2 Complex Characterization .....                                     | 8  |
| 4 Thermogravimetric Analysis .....                                     | 11 |
| 5. Polymerization Details.....                                         | 12 |
| 5.1 NMR Characterization of PLA .....                                  | 12 |
| 5.2 Homopolymerization Results of <i>rac</i> -LA .....                 | 17 |
| 5.3 Kinetic Study .....                                                | 18 |
| 5.4 Computational Results .....                                        | 19 |
| 5.5 MALDI-TOF-MS Spectra .....                                         | 20 |
| 5.6 Proposed mechanism .....                                           | 21 |
| 5.7 Homopolymerization Results of Lactones.....                        | 21 |
| 5.8 Copolymerization Details .....                                     | 23 |
| 6. References.....                                                     | 33 |

## 1 General Information & Methods

All manipulations were carried out with standard Schlenk techniques under argon protection. All solvents and reagents, unless otherwise specified, were purchased from commercial suppliers, and used without additional processing. Toluene, xylene and tetrahydrofuran were refluxed in sodium and distilled under argon. Racemic lactide (*rac*-LA) was recrystallized from toluene once prior to use.  $\epsilon$ -Caprolactone ( $\epsilon$ -CL) and  $\delta$ -valerolactone ( $\delta$ -VL) were distilled under vacuum. Cyclohexene oxide (CHO), propylene oxide (PO), glycidyl methacrylate (GMA) and ethylene glycol diglycidyl ether (EGDE) were refluxed over CaH<sub>2</sub> and distilled under argon.

**NMR:** All <sup>1</sup>H NMR and <sup>13</sup>C NMR spectra were recorded on a JEOL-400YH spectrometer at a frequency of 400 MHz.

**GPC:** The molecular weight ( $M_n$ ) and polydispersity ( $\mathcal{D}$ ) of the polymer was determined by gel permeation chromatography (GPC) on a Waters 2414 binary system with a refractive index detector, calibrated with polystyrene standards. The column temperature was maintained at 40 °C during the test using THF as the eluent at a flow rate of 1.0 mL/min.

**MALDI-TOF-MS:** MALDI-TOF-MS were acquired in linear mode in a  $m/z$  range 1000-10000 using a Bruker microflex LRF-MALDI TOF MS with 2,5-dihydroxybenzoic acid (DHB) as matrix. Samples were dissolved in THF (2-5 mg/mL).

**TGA:** Thermo Gravimetric Analysis (TGA) of the complexes was performed with a TG DTA7200 in a temperature range of 30–150 °C with a heating rate of 10 K min<sup>-1</sup> followed by 50 min at 150 °C.

**DSC:** Differential Scanning Calorimetry (DSC) analysis was performed on NETZSCH DSC 214. The experiments were performed by heating the samples from -70 to 100 °C (heating and cooling scans were repeated, at least in triplicate, to ensure reproducibility). Also, the measurements were carried out at a heating rate of 10 °C/min, in nitrogen atmosphere.

**Computational Details:** The theoretical calculations were performed via the Gaussian 16 suite of programs.<sup>1</sup> The structures of the studied complexes (denoted by MM1~MM3) were fully optimized at the TPSSh-D3BJ/def2-TZVP level of theory. The

vibrational frequencies of the optimized structures were carried out at the same level. The structures were characterized as a local energy minimum on the potential energy surface by verifying that all the vibrational frequencies were real. The natural bond orbital (NBO) analysis was performed via the NBO 3.1 program<sup>2</sup> implemented in Gaussian 16 to give the natural population analysis (NPA) charge distribution and charge transfer energy for the complexes.

## 2 Procedural Information

### 2.1 Complex Synthesis

Guanidine-based ligand and zinc catalyst used were synthesized with reference to the relevant literature.<sup>3,4</sup> The acetonitrile (15 mL) solution of 2-chloro-1,3-dimethylimidazoline (2.53 g, 15 mmol) was added to the acetonitrile (15 mL) solution of 7.5 mmol 1,2-diaminobenzene (**L1**) or 1,8-naphthalenediamine (**L2**) and triethylamine (2.08 mL) at 0 °C. The resulting mixture was refluxed in an oil bath at 83 °C overnight. After cooling to room temperature, NaOH (60 mmol) was added, and the solvent along with triethylamine was removed by vacuum evaporation. The mixture was deprotonated by adding a solution of KOH (30 mL, 50 wt%) and extracted thrice with acetonitrile (30 mL each time). The resulting organic phase was dehydrated with anhydrous Na<sub>2</sub>SO<sub>4</sub> and then distilled under reduced pressure to give the desired ligands.

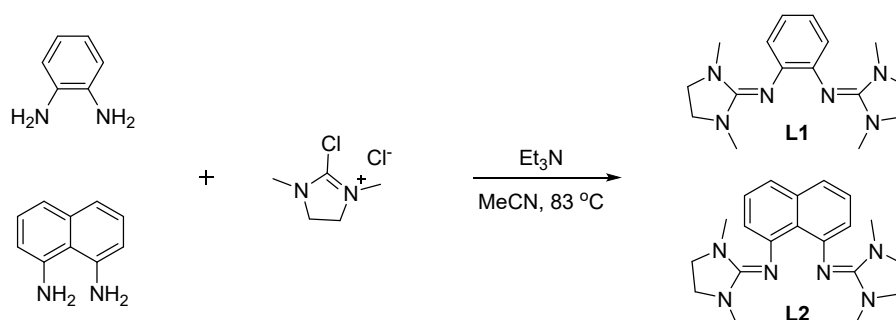

**Scheme S1.** Synthesis route for ligands **L1** and **L2**.

Zinc trifluoromethanesulfonate [Zn(CF<sub>3</sub>SO<sub>3</sub>)<sub>2</sub>] (0.1454 g, 0.4 mmol) and the ligand (1 mmol) were separately mixed in 4 mL and 6 mL of THF. The ligand solution was added dropwise to the Zn(CF<sub>3</sub>SO<sub>3</sub>)<sub>2</sub> solution while stirring at 55 °C, forming a white precipitate. The precipitate was filtered and washed three times with THF and diethyl ether before being vacuum-dried into a white powdery solid.

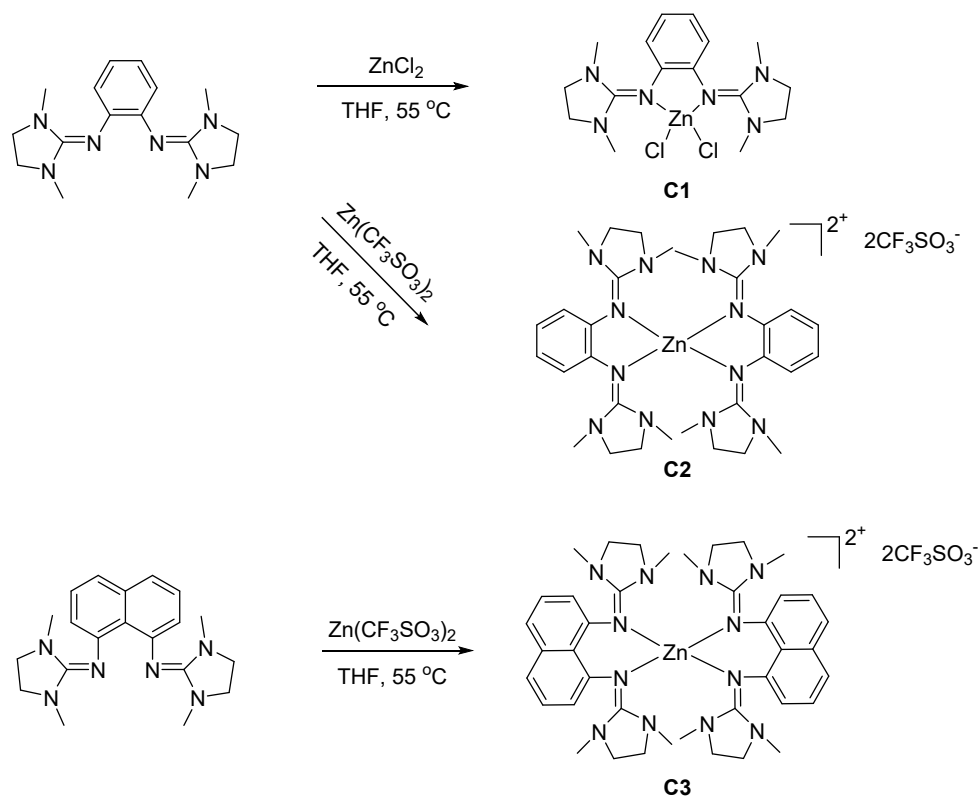

**Scheme S2.** Synthesis route for complexes **C1**, **C2** and **C3**.

Ligand **L1**:  $^1\text{H}$  NMR ( $\text{CDCl}_3$ , 400 MHz):  $\delta = 6.73\text{--}6.78$  (m, 4H, ArH), 3.18(s, 8H, N- $\text{CH}_2$ ), 2.61 (s, 12H, N- $\text{CH}_3$ ) ppm.  $^{13}\text{C}$  NMR ( $\text{CDCl}_3$ , 101 MHz):  $\delta = 153.7, 141.6, 122.8, 120.9, 48.0, 34.0$  ppm.

Ligand **L2**:  $\delta = 6.70\text{--}7.30$  (m, 6H, ArH), 3.24 (s, 8H, N- $\text{CH}_2$ ), 2.59 (s, 12H, N- $\text{CH}_3$ ) ppm.  $^{13}\text{C}$  NMR ( $\text{CDCl}_3$ , 101 MHz):  $\delta = 152.0, 147.6, 136.7, 125.7, 121.1, 117.9, 48.9, 35.0$  ppm.

Complex **C1**:  $^1\text{H}$  NMR ( $\text{CDCl}_3$ , 400 MHz):  $\delta = 6.73$  (m, 4H, ArH), 3.58-3.52 (d, 8H, N- $\text{CH}_2$ ), 2.85 (s, 12H, N- $\text{CH}_3$ ) ppm.  $^{13}\text{C}$  NMR ( $\text{CDCl}_3$ , 101 MHz):  $\delta = 163.3, 139.6, 120.5, 48.5, 35.7$  ppm.

Complex **C2**:  $^1\text{H}$  NMR ( $\text{DMSO-}d_6$ , 400 MHz):  $\delta = 6.95$  (m, 4H, ArH), 3.62-3.53 (m, 8H, N- $\text{CH}_2$ ), 2.57 (s, 12H, N- $\text{CH}_3$ ) ppm.  $^{13}\text{C}$  NMR ( $\text{DMSO-}d_6$ , 101 MHz):  $\delta = 163.0, 137.8, 122.8, 121.6, 48.7, 34.87$  ppm.

Complex **C3**:  $^1\text{H}$  NMR ( $\text{CDCl}_3$ , 400 MHz):  $\delta = 6.67\text{--}7.34$  (m, 12H, ArH), 3.76 (s, 16H, N- $\text{CH}_2$ ), 2.88 (s, 24H, N- $\text{CH}_3$ ) ppm.  $^{13}\text{C}$  NMR ( $\text{CDCl}_3$ , 101 MHz):  $\delta = 158.4, 141.7, 136.6, 126.9, 121.6, 118.6, 115.2, 48.6, 35.2$  ppm.

## 2.2 General Procedure for Homopolymerization of Lactones in Bulk

The types of lactones include *rac*-LA,  $\epsilon$ -CL and  $\delta$ -VL. Taking a typical polymerization of [*rac*-LA]/[Zn] = 5000/1 as an example: The polymerization was conducted in a 20.0 mL pre-dried tube. The necessary amount of zinc complex (5  $\mu$ mol), CHO additive (50  $\mu$ L) and *rac*-LA (25 mmol) were added in the glove box; the mixture was then transferred to an oil bath with a pre-set temperature and allowed to react for a predetermined time. After cooling to room temperature with water and taking out a small amount of the reaction mixture for  $^1\text{H}$  NMR analysis, the remaining mixture was dissolved with a small amount of dichloromethane and precipitated with a large amount of ethanol. The polymer that formed was collected, washed multiple times with ethanol, and dried under vacuum at 45  $^\circ\text{C}$  for overnight.

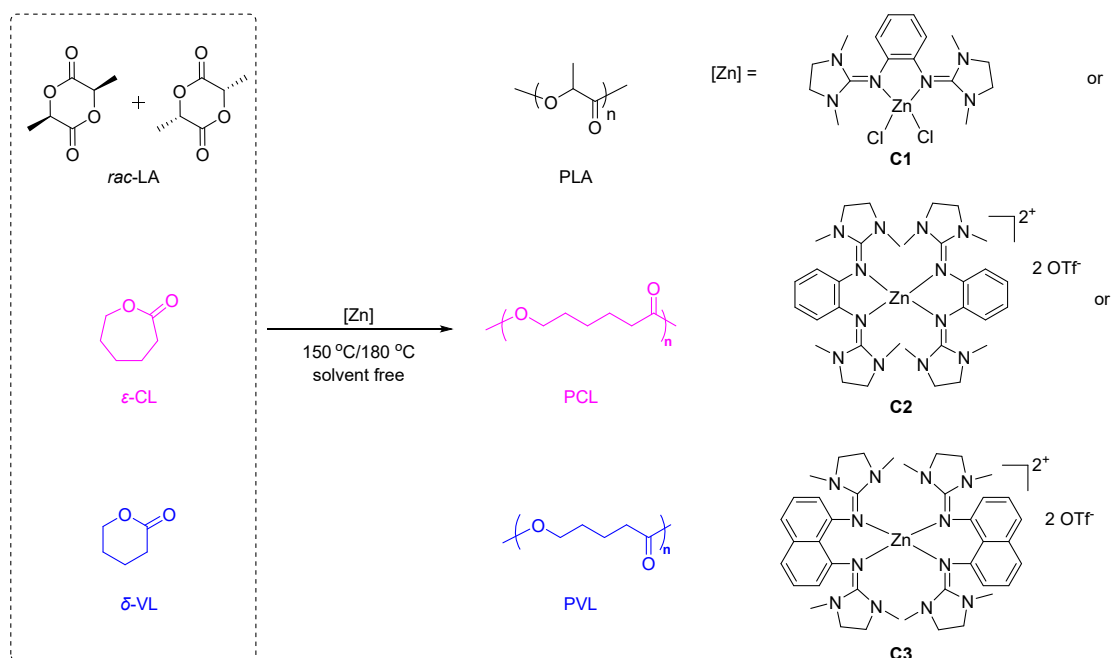

**Scheme S3.** Synthesis route for homopolymerization of different lactone monomers.

## 2.3 Homopolymerization of *rac*-LA in Solution

The polymerization is carried out in a 20.0 mL pre-dried tube. Appropriate amounts of zinc complex (5  $\mu$ mol), CHO additive (50  $\mu$ L), *rac*-LA (25 mmol) and solution (2.5 mL) were added in the glove box; the mixture was then transferred to an oil bath with a pre-set temperature and allowed to react for a predetermined time. After cooling to room temperature with water and taking out a small amount of the reaction mixture for  $^1\text{H}$  NMR analysis, the remaining mixture was precipitated with a large amount of

ethanol. The resulting polymer was collected, washed several times with ethanol and dried overnight under vacuum at 45 °C.

## 2.4 General Procedure for Copolymerization

Take *rac*-LA and  $\epsilon$ -CL as an example: The reaction tube was charged sequentially with *rac*-LA,  $\epsilon$ -CL, zinc complex, and CHO additive. The resulting mixture was stirred for set hours at a temperature of 150 °C, and then cooled down to room temperature using water. A small portion of the reaction mixture was taken out for  $^1\text{H}$  NMR analysis, and then the remaining product was dissolved in  $\text{CH}_2\text{Cl}_2$  and precipitated in ethanol.

## 3 Ligand and Complex Characterization

### 3.1 Ligand Characterization

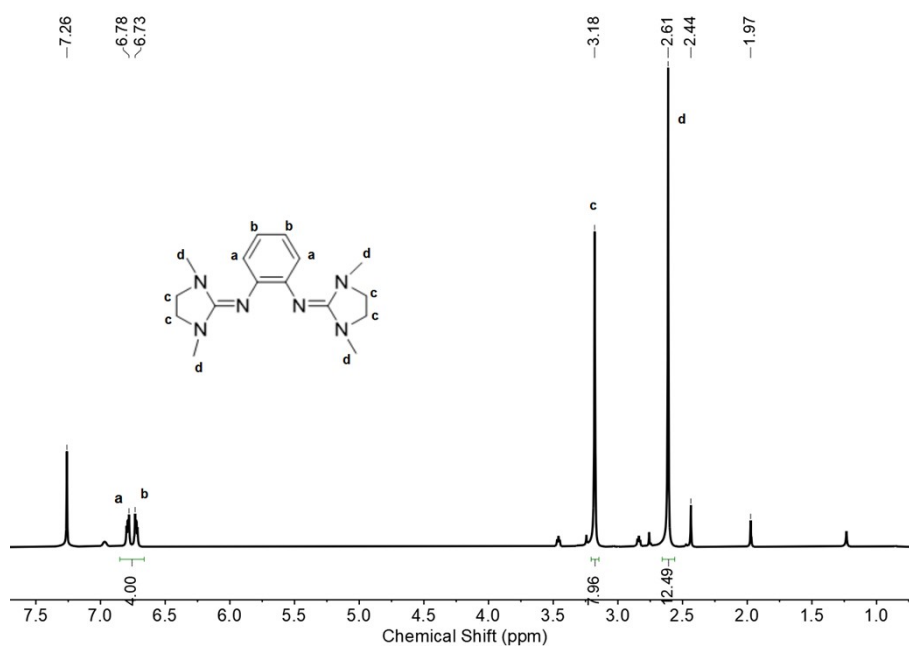

**Figure S1.**  $^1\text{H}$ -NMR spectrum ( $\text{CDCl}_3$ , 400 MHz) of ligand L1.

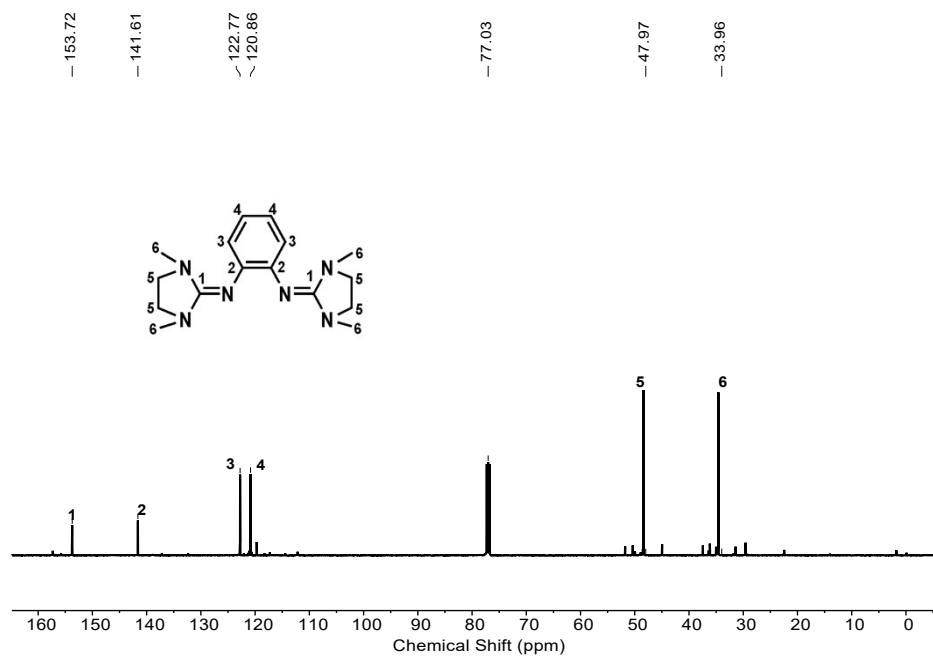

**Figure S2.**  $^{13}\text{C}$ -NMR spectrum ( $\text{CDCl}_3$ , 101 MHz) of ligand L1.

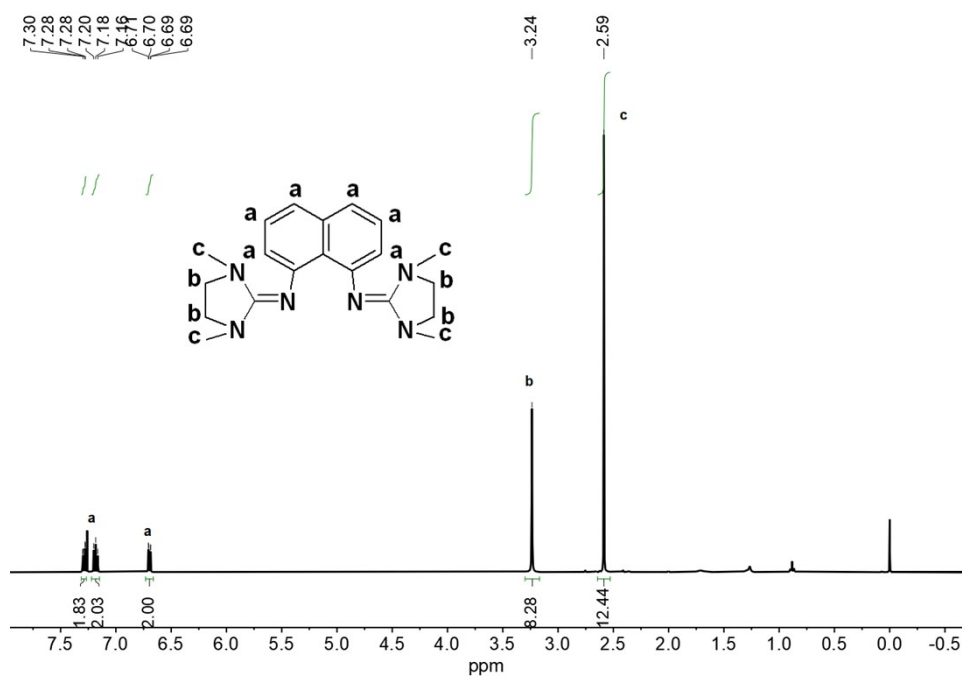

**Figure S3.**  $^1\text{H}$ -NMR spectrum ( $\text{CDCl}_3$ , 400 MHz) of ligand L2.

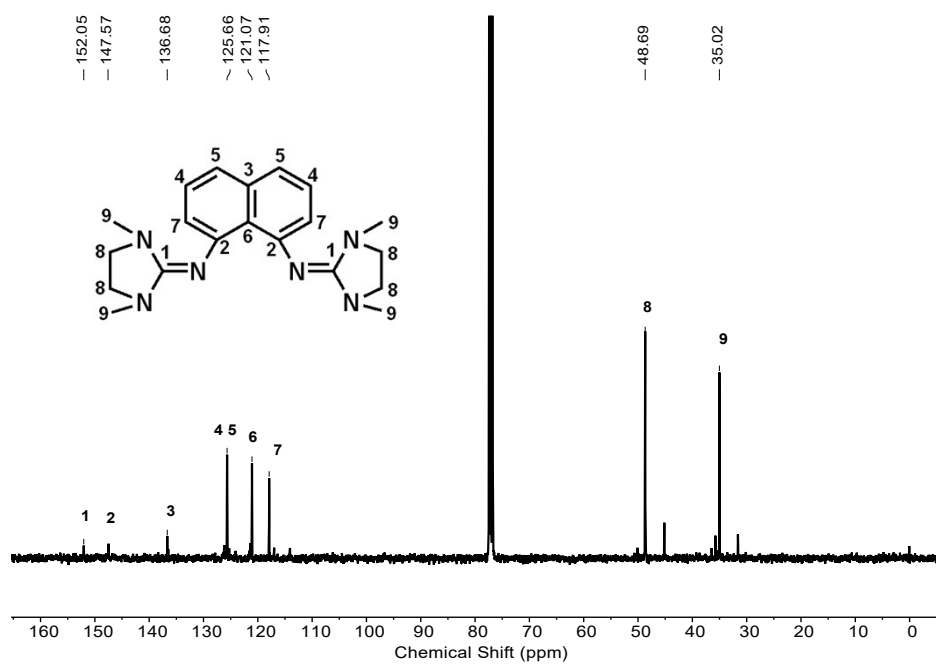

**Figure S4.** <sup>13</sup>C-NMR spectrum (CDCl<sub>3</sub>, 101 MHz) of ligand L2.

### 3.2 Complex Characterization

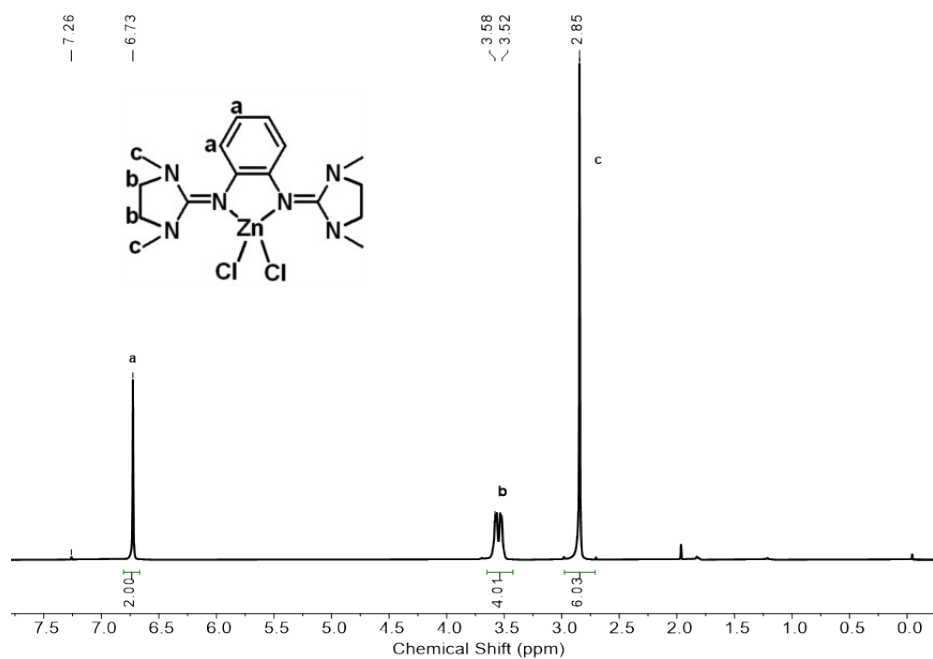

**Figure S5.** <sup>1</sup>H-NMR spectrum (CDCl<sub>3</sub>, 400 MHz) of catalyst C1.



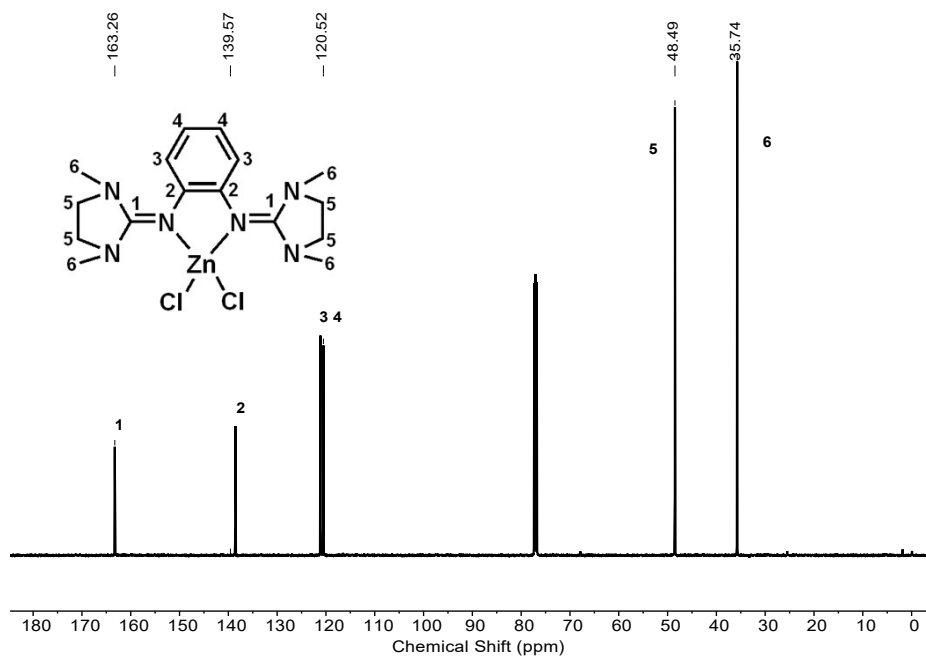

**Figure S6.**  $^{13}\text{C}$ -NMR spectrum ( $\text{CDCl}_3$ , 101 MHz) of catalyst C1.

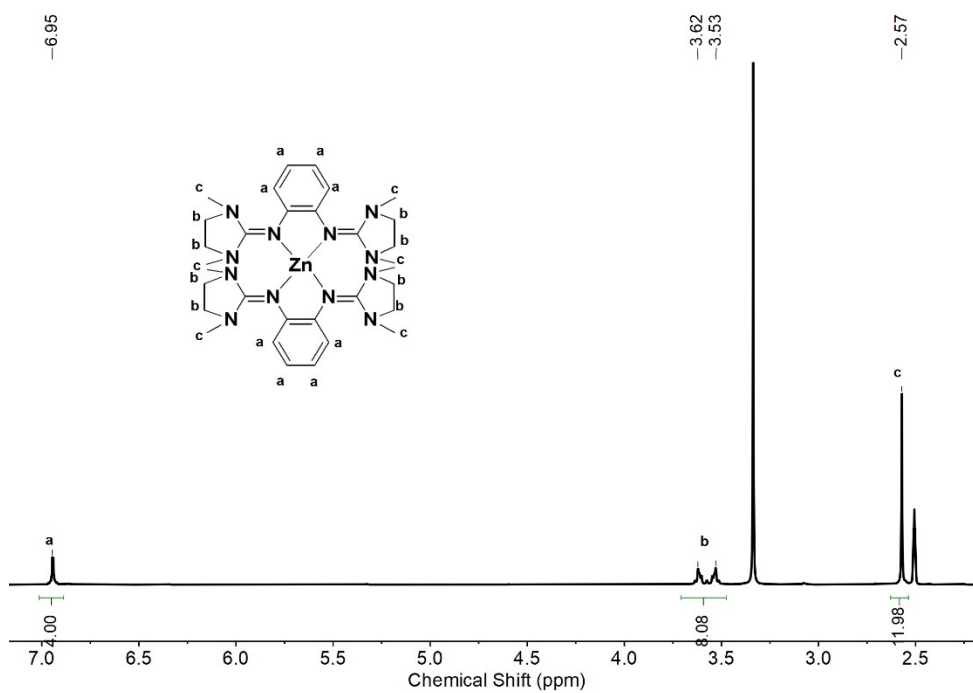

**Figure S7.**  $^1\text{H}$ -NMR spectrum ( $\text{DMSO}-d_6$ , 400 MHz) of catalyst C2.

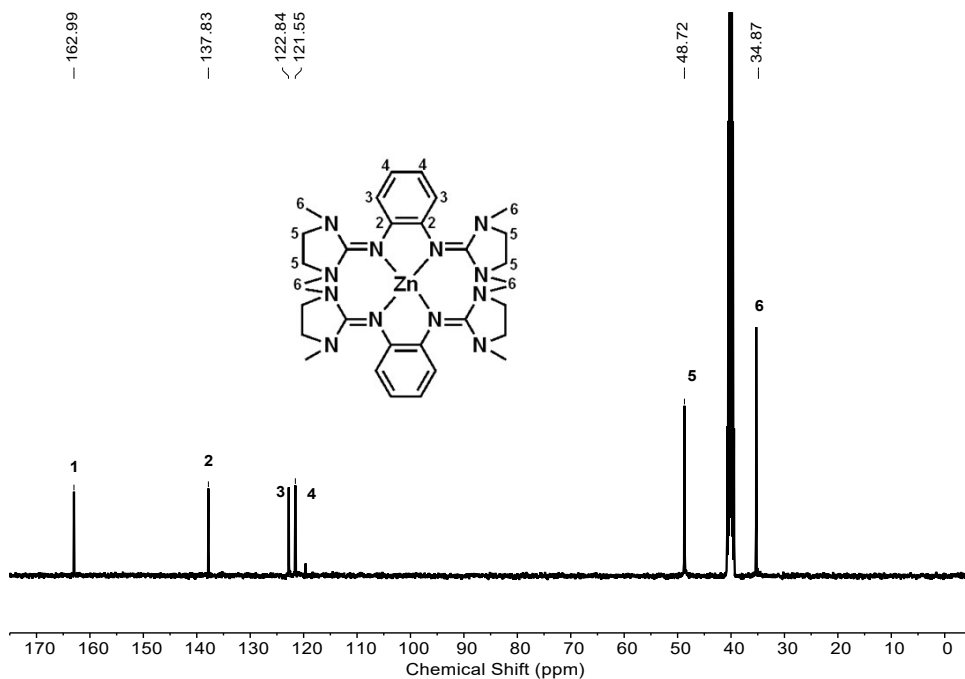

**Figure S8.** <sup>13</sup>C-NMR spectrum (DMSO-*d*<sub>6</sub>, 101 MHz) of catalyst C2.

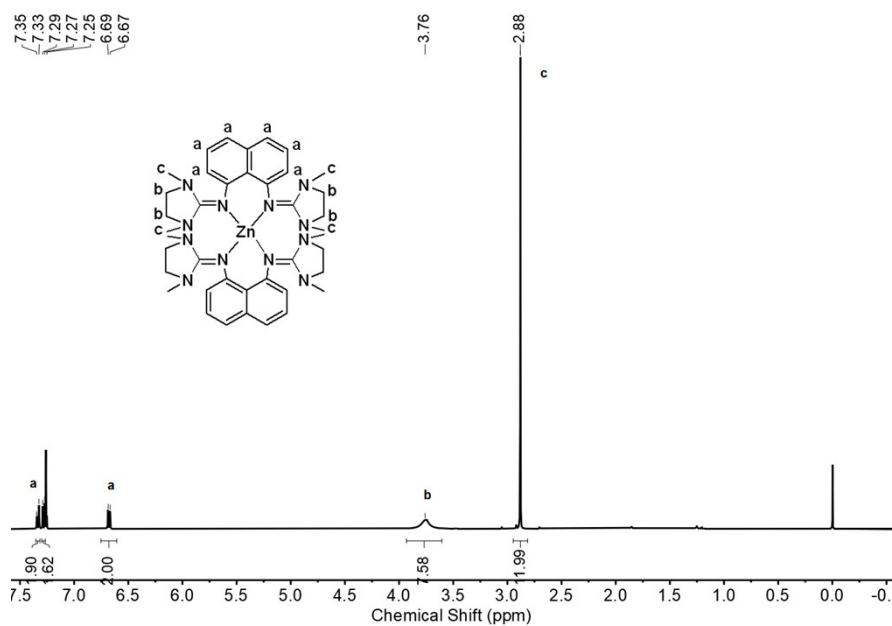

**Figure S9.** <sup>1</sup>H-NMR spectrum (CDCl<sub>3</sub>, 400 MHz) of catalyst C3.

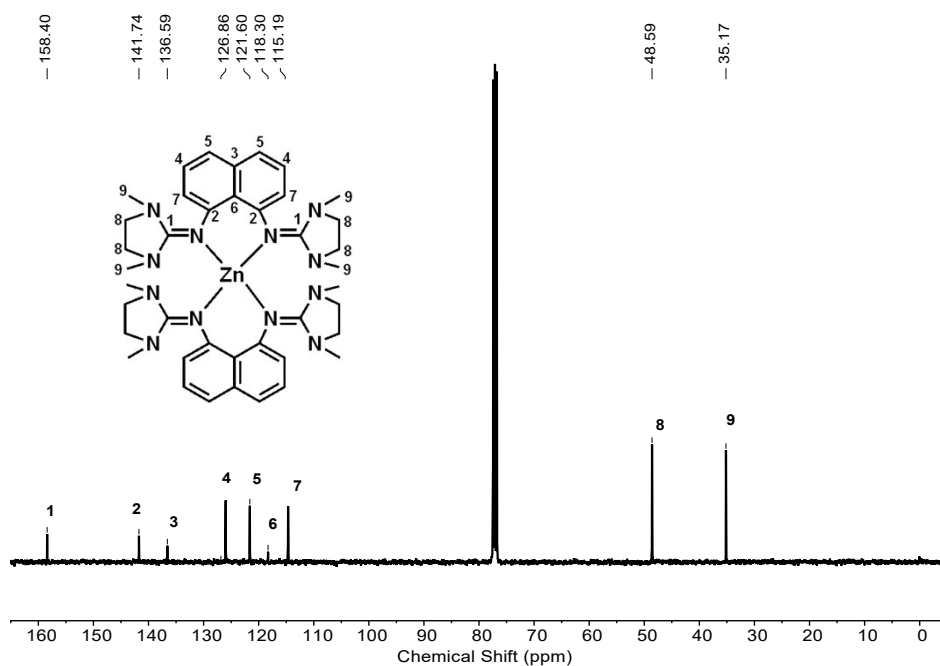

**Figure S10.**  $^{13}\text{C}$ -NMR spectrum ( $\text{CDCl}_3$ , 101 MHz) of catalyst C3.

#### 4 Thermogravimetric Analysis

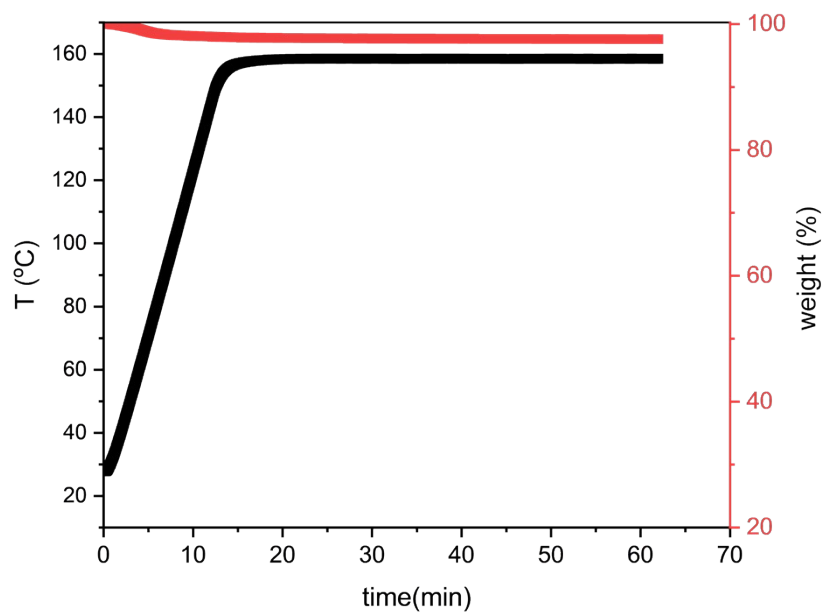

**Figure S11.** TGA measurement of complex C2 at 150 °C.

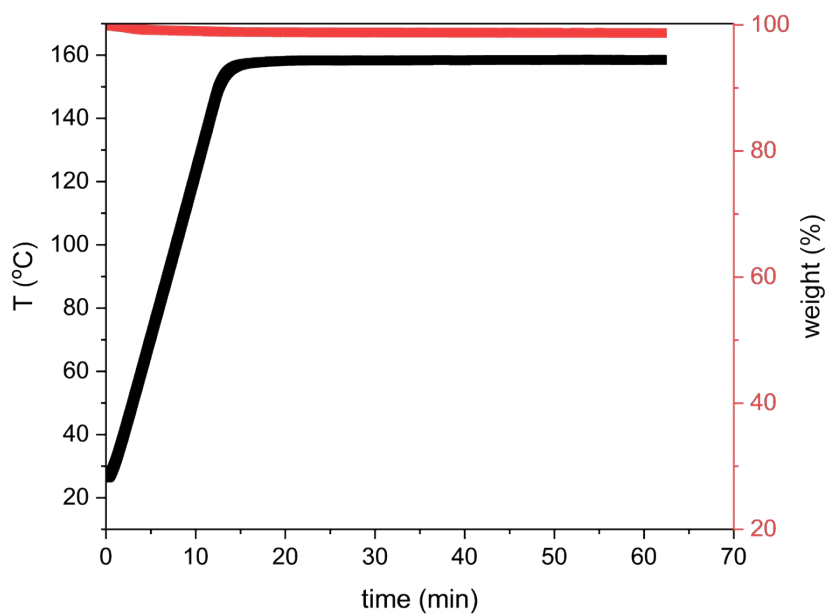

**Figure S12.** TGA measurement of complex C3 at 150 °C.

## 5. Polymerization Details

### 5.1 NMR Characterization of PLA

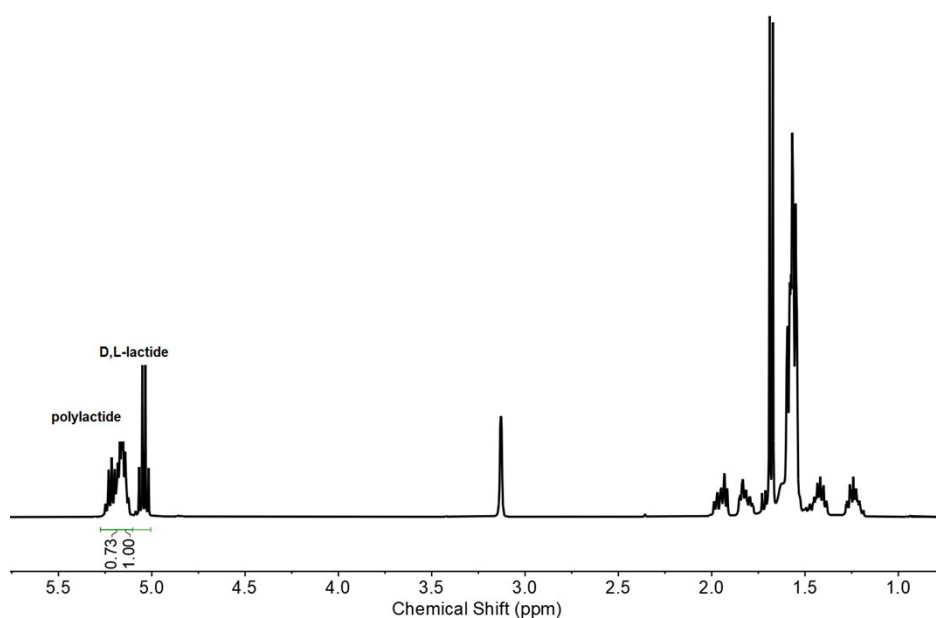

**Figure S13.** Example of <sup>1</sup>H NMR spectrum of lactide polymerization. Conditions: catalyst C1, [LA]/[Cat.] = 5000/1, [CHO] = 50 μL, 150 °C, 70 min (Table 1, entry 1).

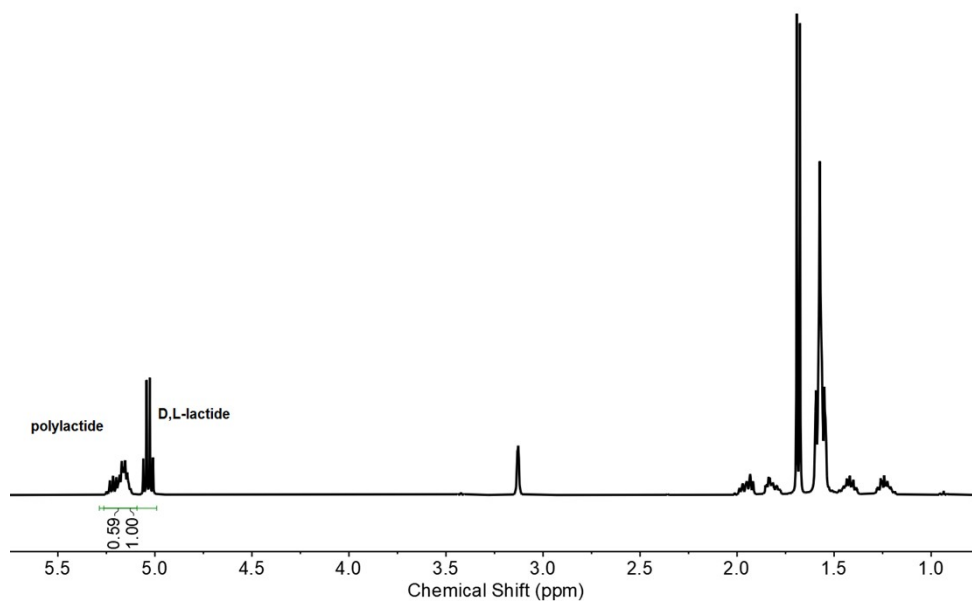

**Figure S14.** Example of  $^1\text{H}$  NMR spectrum of lactide polymerization. Conditions: catalyst **C2**,  $[\text{LA}]/[\text{Cat.}] = 5000/1$ ,  $[\text{CHO}] = 50 \mu\text{L}$ ,  $150 \text{ }^\circ\text{C}$ , 30 min (Table 1, entry 2).

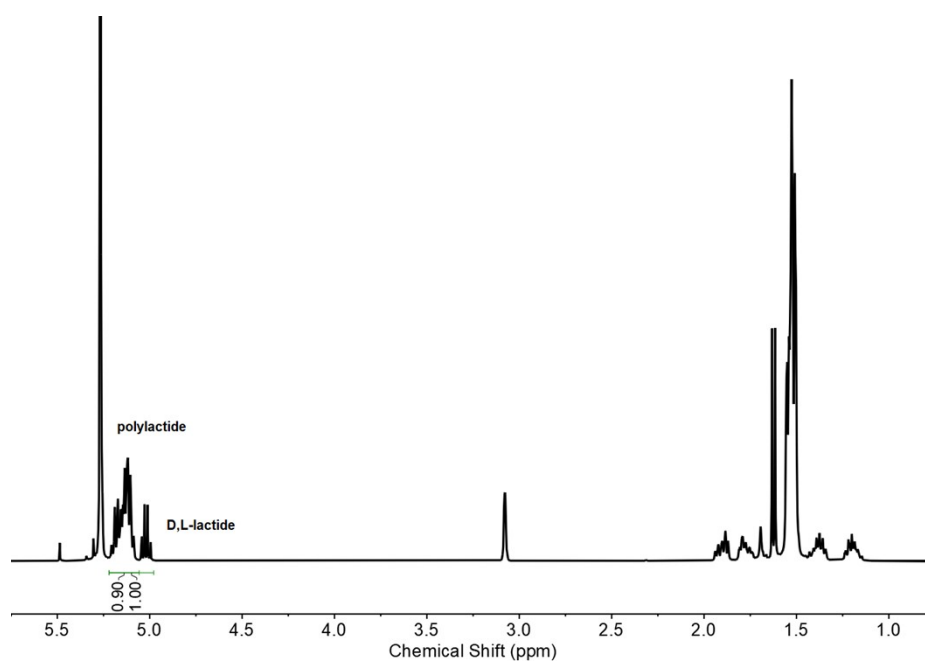

**Figure S15.** Example of  $^1\text{H}$  NMR spectrum of lactide polymerization. Conditions: catalyst **C3**,  $[\text{LA}]/[\text{Cat.}] = 5000/1$ ,  $[\text{CHO}] = 50 \mu\text{L}$ ,  $150 \text{ }^\circ\text{C}$ , 30 min (Table 1, entry 4).

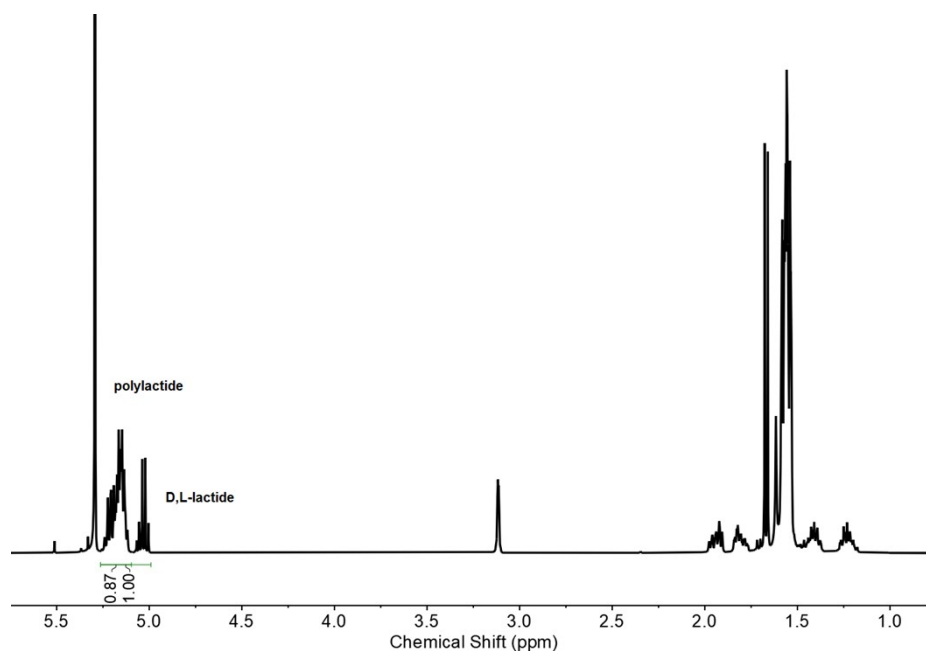

**Figure S16.** Example of  $^1\text{H}$  NMR spectrum of lactide polymerization. Conditions: catalyst **C2**,  $[\text{LA}]/[\text{Cat.}] = 10000/1$ ,  $[\text{CHO}] = 100 \mu\text{L}$ ,  $180 \text{ }^\circ\text{C}$ , 50 min (Table 2, entry 2).

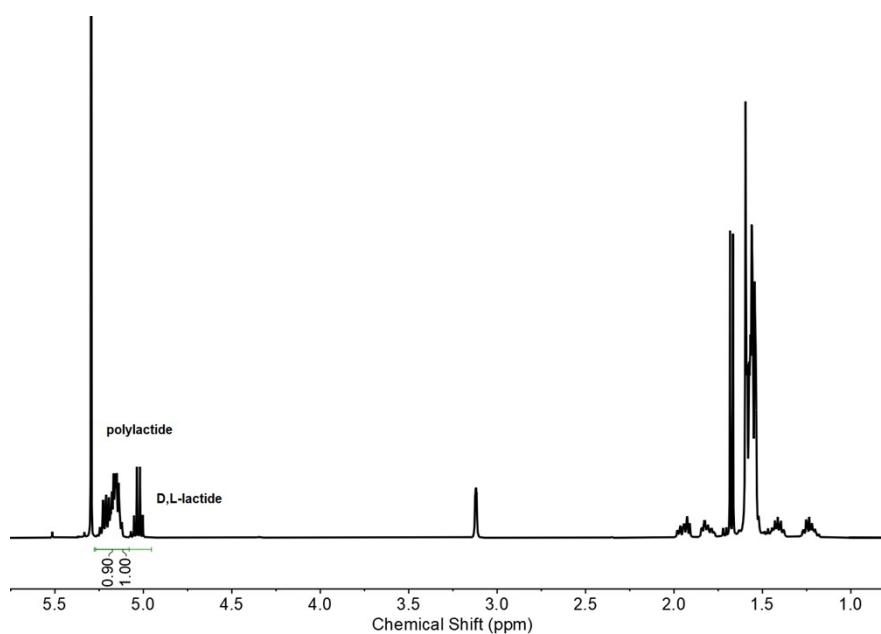

**Figure S17.** Example of  $^1\text{H}$  NMR spectrum of lactide polymerization. Conditions: catalyst **C3**,  $[\text{LA}]/[\text{Cat.}] = 10000/1$ ,  $[\text{CHO}] = 100 \mu\text{L}$ ,  $180 \text{ }^\circ\text{C}$ , 30 min (Table 2, entry 4).

The parameter  $P_m$  is the tetrad probability to give *meso* enchainment between monomer units and is determined from the methine region of the homonuclear decoupled  $^1\text{H}$  NMR spectrum:  $[\text{mmm}] = P_m^2 + (1 - P_m)P_m/2$ ,  $[\text{mmr}] = [\text{rmm}] = (1 - P_m)P_m/2$ ,  $[\text{rmr}] = (1 - P_m)^2/2$ , and  $[\text{mrm}] = [(1 - P_m)^2 + P_m(1 - P_m)]/2$ .

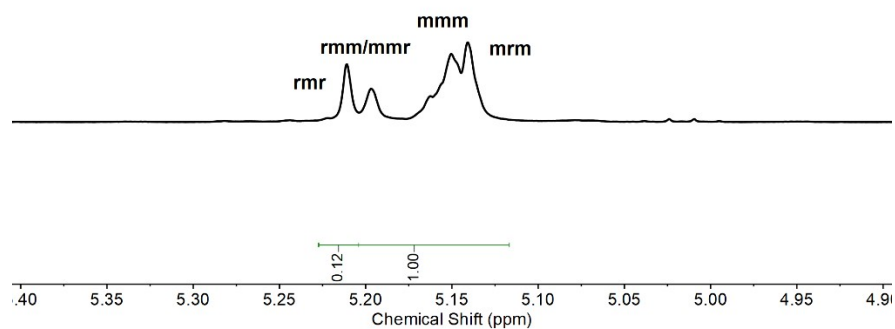

**Figure S18.** Homonuclear decoupled  $^1\text{H}$  NMR spectrum of the methine part of poly(*rac*-LA),  $P_m = 0.51$ . (Table 1, entry 1).

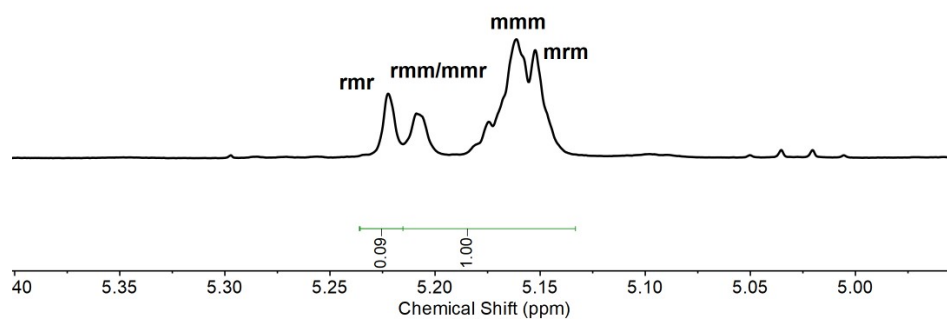

**Figure S19.** Homonuclear decoupled  $^1\text{H}$  NMR spectrum of the methine part of poly(*rac*-LA),  $P_m = 0.58$ . (Table 1, entry 2).

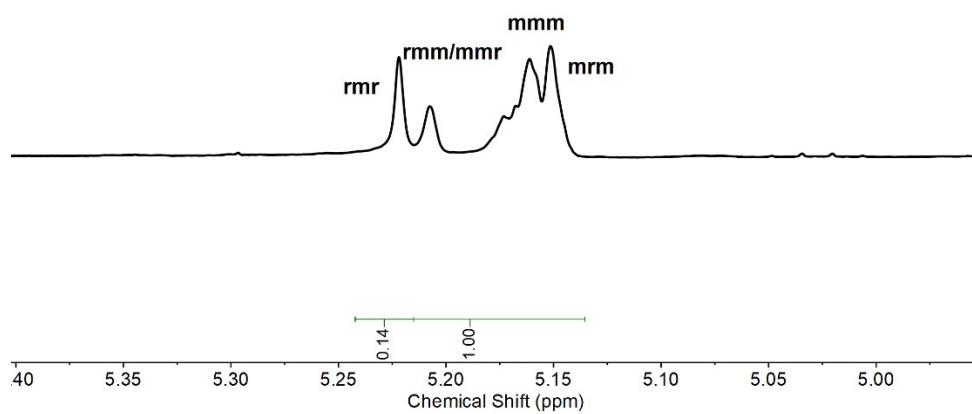

**Figure S20.** Homonuclear decoupled  $^1\text{H}$  NMR spectrum of the methine part of poly(*rac*-LA),  $P_m = 0.47$ . (Table 1, entry 3).

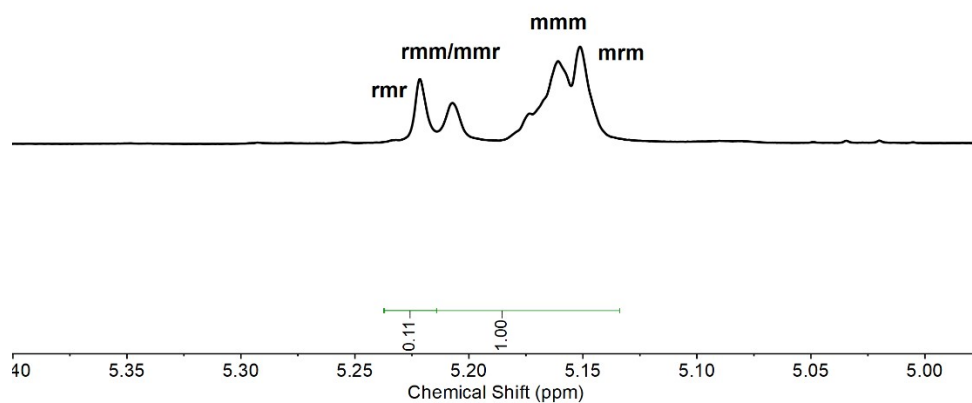

**Figure S21.** Homonuclear decoupled  $^1\text{H}$  NMR spectrum of the methine part of poly(*rac*-LA),  $P_m = 0.53$ . (Table 2, entry 4).



## 5.2 Homopolymerization Results of *rac*-LA

**Table S1.** ROP of *rac*-LA catalyzed by different catalyst/epoxide catalytic systems.<sup>a</sup>

| Entry          | Cat.      | LA:epoxide:Cat. | t/<br>min | Conv. <sup>b</sup> /% | TOF <sup>c</sup> /<br>h <sup>-1</sup> | $M_n^d$ /<br>kg/mol | $\bar{D}^d$ |
|----------------|-----------|-----------------|-----------|-----------------------|---------------------------------------|---------------------|-------------|
| 1              | <b>C2</b> | 1000:0:1        | 120       | trace                 | -                                     | -                   | -           |
| 2              | <b>C2</b> | 1000:300:1      | 50        | 81                    | 972                                   | 19.7                | 1.34        |
| 3 <sup>e</sup> | <b>C3</b> | 5000:1000:1     | 15        | 56                    | 11200                                 | 26.6                | 1.58        |
| 4 <sup>f</sup> | <b>C3</b> | 5000:1000:1     | 15        | 94                    | 18800                                 | 5.0                 | 1.33        |
| 5 <sup>g</sup> | <b>C3</b> | 5000:1000:1     | 15        | 71                    | 14200                                 | 12.4                | 1.27        |
| 6              | <b>C3</b> | 5000:1000:1     | 15        | 78                    | 15600                                 | 26.7                | 1.29        |
| 7              | <b>C3</b> | 5000:300:1      | 15        | trace                 | -                                     | -                   | -           |
| 8              | <b>C3</b> | 5000:300:1      | 40        | 54                    | 4050                                  | 12.8                | 1.36        |
| 9              | <b>C3</b> | 5000:500:1      | 15        | 9                     | 1800                                  | 7.9                 | 1.22        |
| 10             | <b>C3</b> | 5000:500:1      | 40        | 58                    | 4350                                  | 23.8                | 1.36        |

<sup>a</sup> Conditions: 150 °C, 0.01 mmol [Zn], epoxide=CHO. <sup>b</sup> According to <sup>1</sup>H NMR. <sup>c</sup> Turnover frequency (TOF) = mol of monomer consumed per mole of Zn per hour, in h<sup>-1</sup>. <sup>d</sup> Experimental  $M_n$  values determined by GPC in THF vs. polystyrene standards using a correcting factor of 0.58.<sup>5</sup> <sup>e</sup> epoxide = PO. <sup>f</sup> epoxide = GMA. <sup>g</sup> epoxide = EGDE.

**Table S2.** R OP of *rac*-LA catalyzed by **C3** upon different solvents.<sup>a</sup>

| Entry          | solvent        | Conv. <sup>b</sup> /% | TOF <sup>c</sup> /h <sup>-1</sup> | $M_n$ /(kg/mol) <sup>d</sup> | $\bar{D}^d$ |
|----------------|----------------|-----------------------|-----------------------------------|------------------------------|-------------|
| 1              | toluene        | trace                 | -                                 | -                            | -           |
| 2              | xylene         | 19                    | 1900                              | 7.8                          | 1.21        |
| 3 <sup>e</sup> | diphenyl ether | trace                 | -                                 | -                            | -           |
| 4              | diphenyl ether | 40                    | 4000                              | 8.5                          | 1.23        |

<sup>a</sup> Condition: LA/**C3** = 5000/1, [Zn] = 5 μmol, [CHO] = 50 μL, 30 min, solvent = 2.5 mL, T(toluene) = 100 °C, T(diphenyl ether) and T(xylene) = 150 °C. <sup>b</sup> According to <sup>1</sup>H NMR. <sup>c</sup> Turnover frequency (TOF) = mol of monomer consumed per mole of Zn per hour, in h<sup>-1</sup>. <sup>d</sup> Experimental  $M_n$  values determined by GPC in THF vs. polystyrene standards using a correcting factor of 0.58.<sup>5</sup> <sup>e</sup> Without CHO.

### 5.3 Kinetic Study

**Table S3.** Kinetic study of ROP of *rac*-LA catalyzed by complex **C2** and **C3**.<sup>a</sup>

| Catalyst  | t/min | Conv. <sup>b</sup> /% | TOF <sup>c</sup> /h <sup>-1</sup> | $M_n$ /(kg/mol) <sup>d</sup> | $\bar{D}$ <sup>d</sup> |
|-----------|-------|-----------------------|-----------------------------------|------------------------------|------------------------|
| <b>C2</b> | 18    | 39                    | 6500                              | 18.0                         | 1.22                   |
|           | 25    | 57                    | 6840                              | 18.6                         | 1.18                   |
|           | 30    | 59                    | 5900                              | 24.5                         | 1.22                   |
|           | 45    | 78                    | 5200                              | 21.4                         | 1.32                   |
|           | 50    | 81                    | 4860                              | 19.2                         | 1.38                   |
| <b>C3</b> | 10    | 70                    | 21000                             | 27.3                         | 1.26                   |
|           | 13    | 75                    | 17310                             | 25.6                         | 1.47                   |
|           | 15    | 78                    | 15600                             | 26.7                         | 1.29                   |
|           | 20    | 85                    | 12750                             | 28.4                         | 1.36                   |
|           | 30    | 90                    | 9000                              | 22.2                         | 1.48                   |

<sup>a</sup> Condition: LA/[Zn] = 5000/1, [Zn] = 5  $\mu$ mol, [CHO] = 50  $\mu$ L, 150°C. <sup>b</sup> According to <sup>1</sup>H NMR. <sup>c</sup> Turnover frequency (TOF) = mol of monomer consumed per mole of Zn per hour, in h<sup>-1</sup>. <sup>d</sup> Experimental  $M_n$  values determined by GPC in THF vs. polystyrene standards using a correcting factor of 0.58.<sup>5</sup>

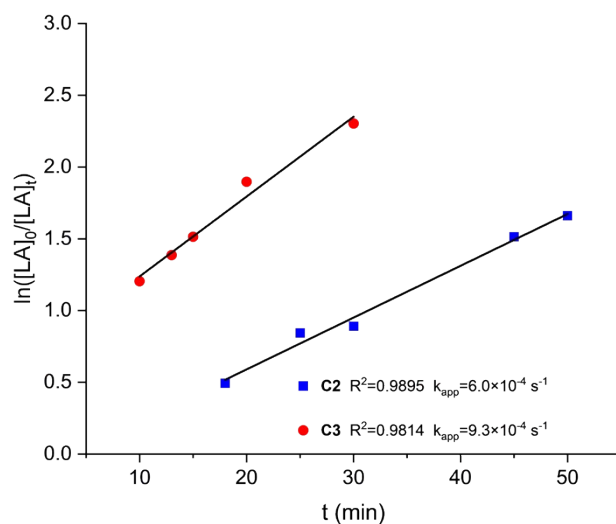

**Figure S22.** Kinetic plots for ROP of *rac*-LA with **C2** and **C3** (Table S2).

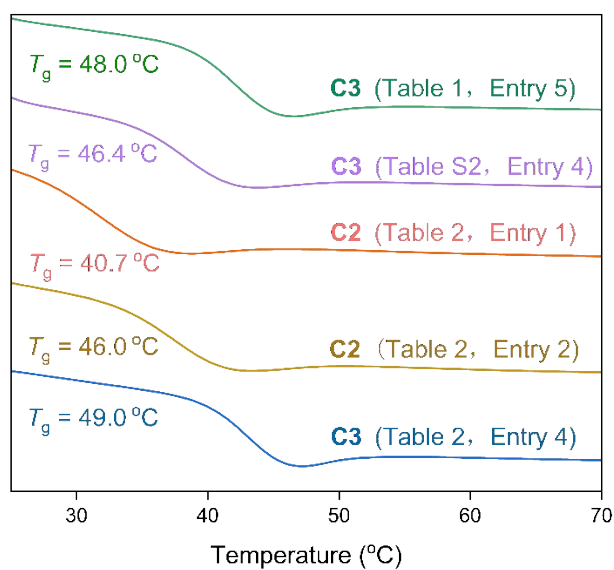

**Figure S23.** DSC traces for the obtained PLA.

## 5.4 Computational Results

**Table S4.** Selected NPA charges and charge transfer energies of the complex cations in **C1**, **C2**, and **C3** (NBO 3.1, TPSSh/def2-TZVP GD3BJ)

| Cation    | Zn-N [ $\text{\AA}$ ]          | NPA charge<br>[e units] Zn | Charge transfer energies<br>[kcal/mol] N $\rightarrow$ Zn |
|-----------|--------------------------------|----------------------------|-----------------------------------------------------------|
| <b>C1</b> | 1.4878, 1.8207                 | 0.84602                    | 36, 38                                                    |
| <b>C2</b> | 1.6906, 1.6905, 1.6906, 1.6906 | 0.82528                    | 36, 36, 36, 36                                            |
| <b>C3</b> | 1.9124, 1.5984, 1.5989, 1.9092 | 0.80656                    | 33, 35, 35, 33                                            |

## 5.5 MALDI-TOF-MS Spectra

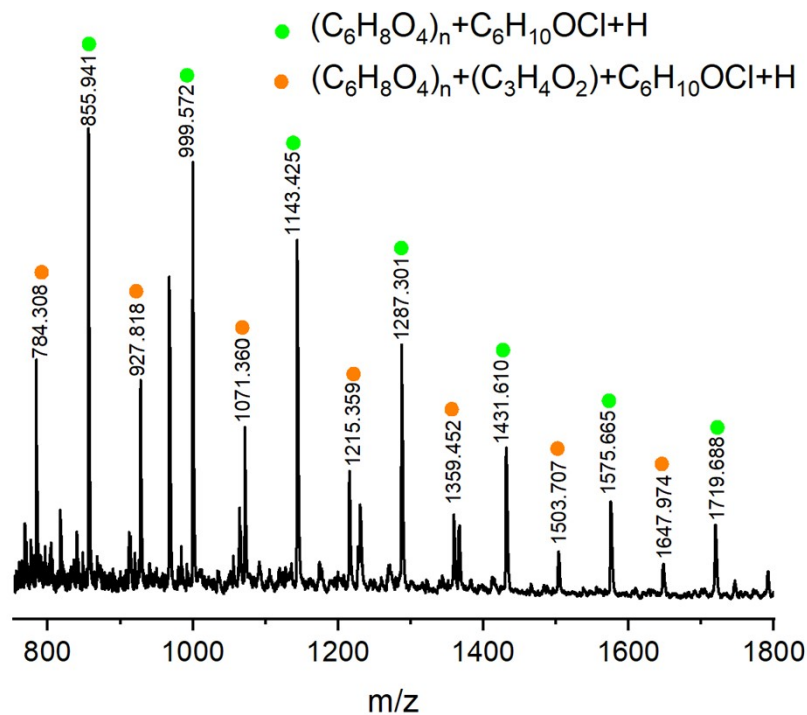

**Figure S24.** The MALDI-TOF mass spectrum of the PLA obtained using C1 (entry 1, Table 1).

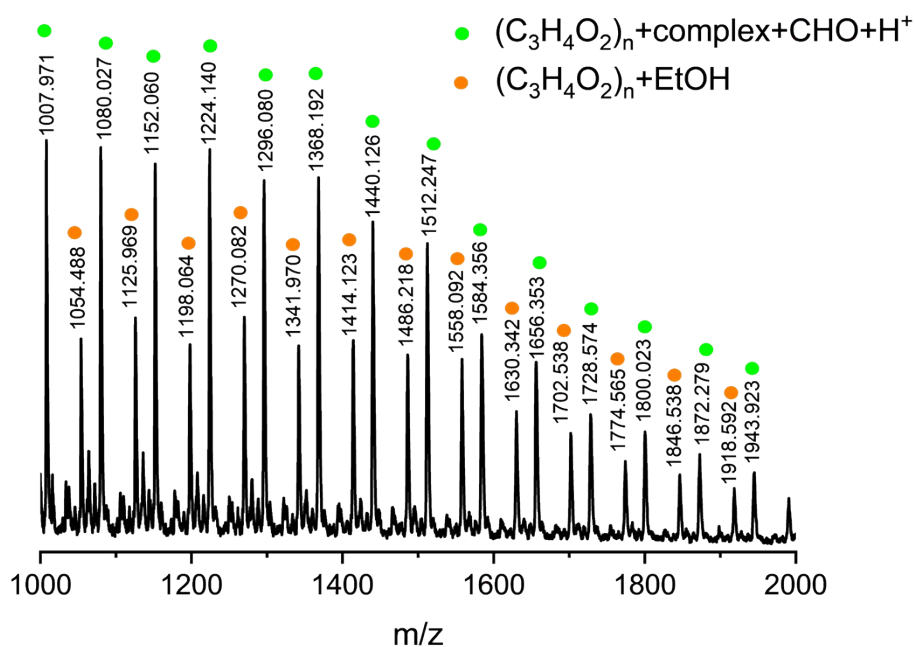

**Figure S25.** The MALDI-TOF mass spectrum of the PLA obtained using C3 (entry 4, Table 2).

## 5.6 Proposed mechanism

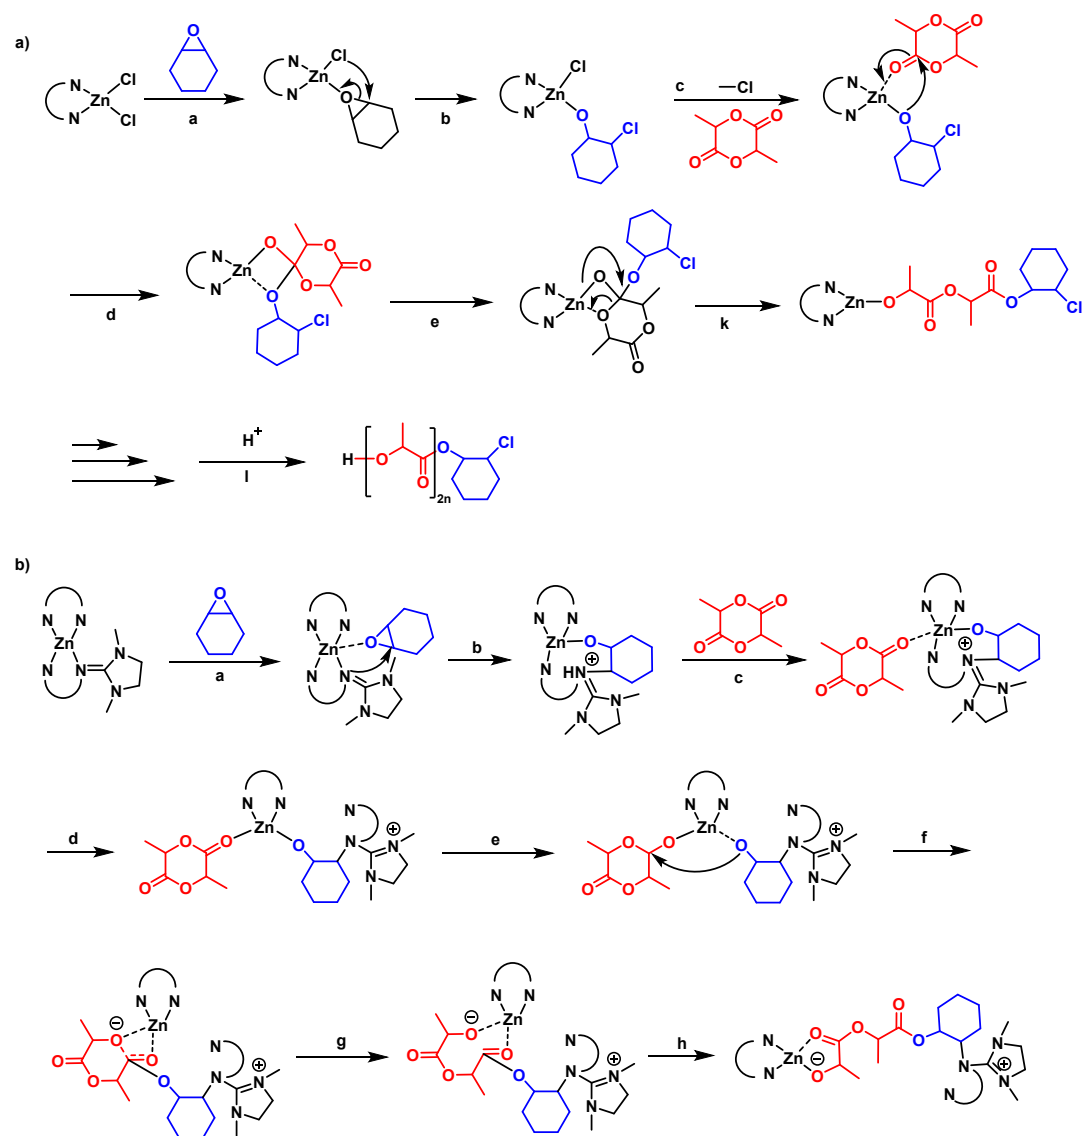

**Figure S26.** Proposed reaction mechanism for the PLA formation in the presence of catalyst **C1** (a) and **C3** (b).

## 5.7 Homopolymerization Results of Lactones

**Table S5.** ROP of different lactones catalyzed by **C3**.<sup>a</sup>

| Entry          | monomer        | M:Cat. | t<br>/h | Conv. <sup>b</sup><br>/% | TOF <sup>c</sup><br>/h <sup>-1</sup> | $M_n^d$<br>(kg/mol) | $\bar{D}^d$ | $T_g/T_m^e$<br>/°C |
|----------------|----------------|--------|---------|--------------------------|--------------------------------------|---------------------|-------------|--------------------|
| 1              | $\epsilon$ -CL | 5000:1 | 2.5     | 63                       | 1260                                 | 66.0                | 1.34        | -44.0/54.9         |
| 2 <sup>f</sup> | $\delta$ -VL   | 1000:1 | 5       | 83                       | 166                                  | 18.0                | 1.29        | -42.5/52.7         |

<sup>a</sup> Condition: [Zn] = 0.01 mmol, [CHO] = 0.3 mL, 150 °C. <sup>b</sup> According to <sup>1</sup>H NMR. <sup>c</sup> Turnover

frequency (TOF) = mol of monomer consumed per mole of Zn per hour, in  $\text{h}^{-1}$ .<sup>d</sup> Experimental  $M_n$  values determined by GPC in THF vs. polystyrene standards using a correcting factor of 0.56 for  $\epsilon$ -CL, 0.57 for  $\delta$ -VL.<sup>e</sup> Determined by DSC. <sup>f</sup>  $[\text{CHO}] = 0.5 \text{ mL}$ .

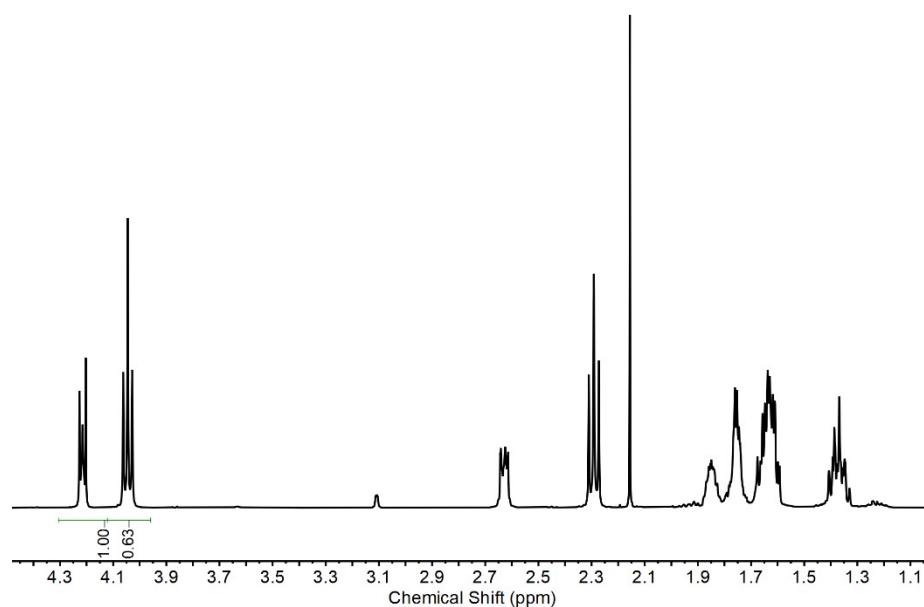

**Figure S27.**  $^1\text{H}$  NMR spectrum of  $\epsilon$ -CL polymerization. Conditions: catalyst **C3**,  $[\epsilon\text{-CL}]/[\text{Cat.}] = 5000/1$ ,  $[\text{CHO}] = 0.3 \text{ mL}$ ,  $150 \text{ }^\circ\text{C}$ ,  $2.5 \text{ h}$  (Table S5, entry 1).

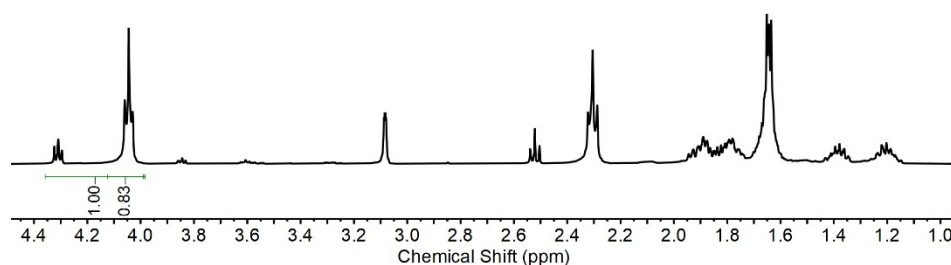

**Figure S28.**  $^1\text{H}$  NMR spectrum of  $\delta$ -VL polymerization. Conditions: catalyst **C3**,  $[\delta\text{-VL}]/[\text{Cat.}] = 1000/1$ ,  $[\text{CHO}] = 0.5 \text{ mL}$ ,  $150 \text{ }^\circ\text{C}$ ,  $5 \text{ h}$  (Table S5, entry 2).

## 5.8 Copolymerization Details

**Table S6** Copolymerization of different lactones catalyzed by complex **C3**.<sup>a</sup>

| Entry            | monomers |    | M1:M2:Cat.  | t<br>/h | Conv./% <sup>b</sup> |     | $M_n/\bar{D}^c$ | $T_g^d$<br>/°C | $T_m^d$<br>/°C |
|------------------|----------|----|-------------|---------|----------------------|-----|-----------------|----------------|----------------|
|                  | M1       | M2 |             |         | M1                   | M2  |                 |                |                |
| 1 <sup>e</sup>   | CL       | VL | 700:700:1   | 5       | 24                   | 48  | 8.7/1.08        | - <sup>h</sup> | -              |
| 2 <sup>f</sup>   | CL       | VL | 700:700:1   | 5       | 98                   | 92  | 21.4/1.40       | /              | 19.6           |
| 3 <sup>f,g</sup> | CL       | VL | 700:700:1   | 4       | 98                   | 88  | 20.1/1.48       | /              | 18.6           |
| 4                | CL       | LA | 1000:1000:1 | 4       | 31                   | >99 | 17.6/1.40       | 15.1           | /              |
| 5 <sup>g</sup>   | CL       | LA | 1000:1000:1 | 3.5     | 88                   | >99 | 12.3/1.39       | -12.9          | 19.0           |
| 6                | VL       | LA | 700:1000:1  | 5       | 43                   | 89  | 6.3/1.22        | 23.4           | /              |

<sup>a</sup> Condition: 150 °C, [Zn] = 0.01 mmol, [CHO] = 0.5 mL. <sup>b</sup> According to <sup>1</sup>H NMR. <sup>c</sup> Experimental  $M_n$  values determined by GPC in THF vs. polystyrene standards. The unit of  $M_n$  is kg/mol. <sup>d</sup> Determined by DSC. <sup>e</sup> Without CHO. <sup>f</sup> [CHO] = 0.3 mL. <sup>g</sup> Performed at 180 °C. <sup>h</sup> Not determined.

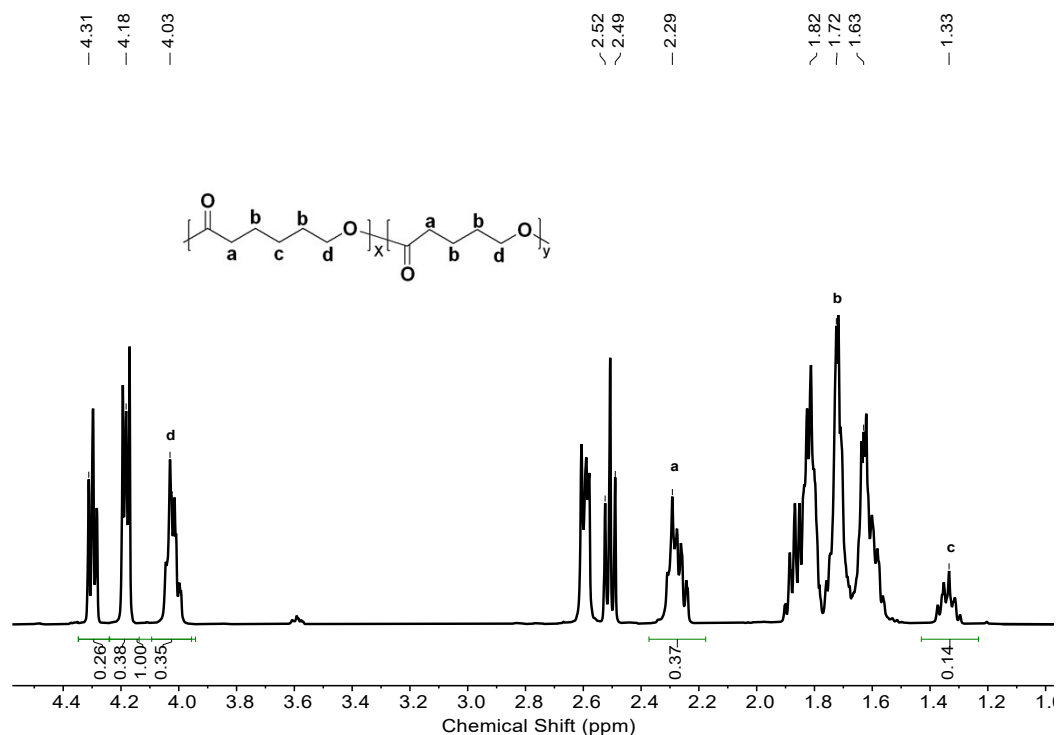

**Figure S29.** <sup>1</sup>H NMR spectrum of copolymerization. Conditions: catalyst **C3**, 150 °C, [VL]/[CL]/[Cat.] = 700:700:1 (Table 3, entry 1).

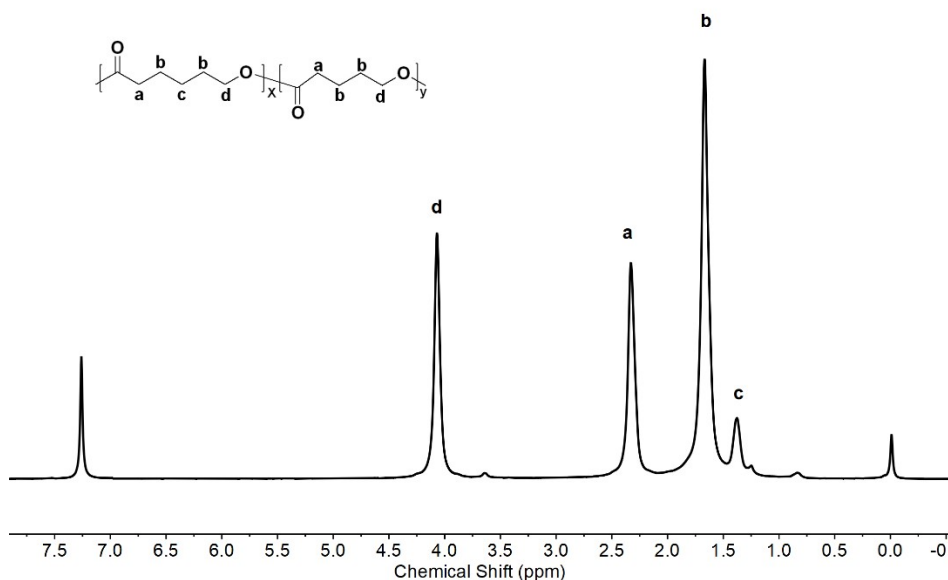

**Figure S30.**  $^1\text{H}$  NMR spectrum of copolymerization after purification. Conditions: catalyst **C3**, 150 °C,  $[\text{VL}]/[\text{CL}]/[\text{Cat.}] = 700:700:1$  (Table 3, entry 1).

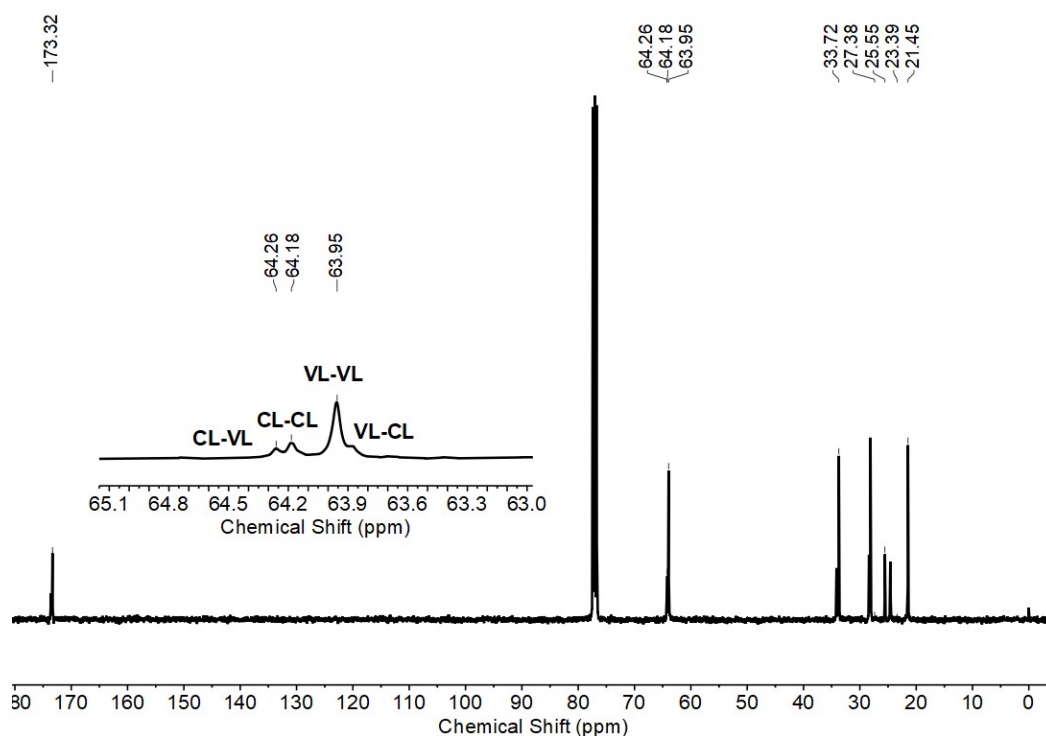

**Figure S31.**  $^{13}\text{C}$  NMR spectrum of copolymerization after purification. Conditions: catalyst **C3**, 150 °C,  $[\text{VL}]/[\text{CL}]/[\text{Cat.}] = 700:700:1$  (Table 3, entry 1).

Calculating the randomness of CL and VL copolymerization: the average sequence length ( $L$ ) and the randomness ( $R$ ) are calculated according to the following equations, where  $L_{\text{CL}}$  and  $L_{\text{VL}}$  represent the sequence lengths of CL and VL chain segments, respectively.<sup>6</sup>



$$L_{CL} = \frac{I_{cc} + I_{vc}}{I_{vc}} \quad (\text{Eq. 1})$$

$$L_{VL} = \frac{I_{vv} + I_{cv}}{I_{cv}} \quad (\text{Eq. 2})$$

$$R = \frac{1}{L_{CL}} + \frac{1}{L_{VL}} \quad (\text{Eq. 3})$$

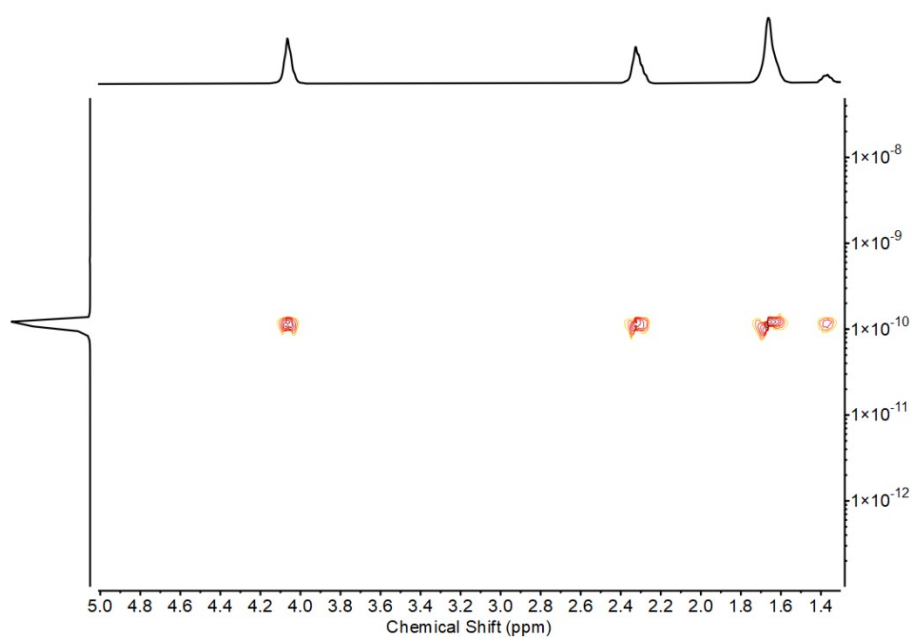

**Figure S32.** DOSY NMR spectrum ( $\text{CDCl}_3$ ) of the PVL/PCL copolymer. Conditions: catalyst **C3**, 150 °C,  $[\text{VL}]/[\text{CL}]/[\text{Cat.}] = 700:700:1$  (Table 3, entry 1).

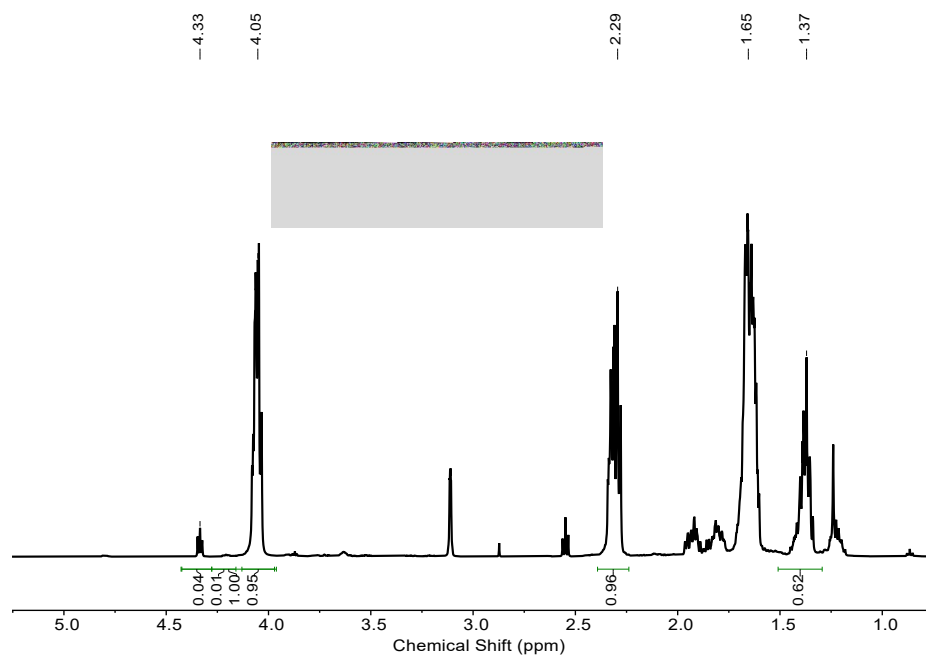

**Figure S33.**  $^1\text{H}$  NMR spectrum of copolymerization. Conditions: catalyst **C3**,  $[\text{CHO}] = 0.3 \text{ mL}$ ,  $150 \text{ }^\circ\text{C}$ ,  $[\text{VL}]/[\text{CL}]/[\text{Cat.}] = 700:700:1$  (Table 3, entry 2).

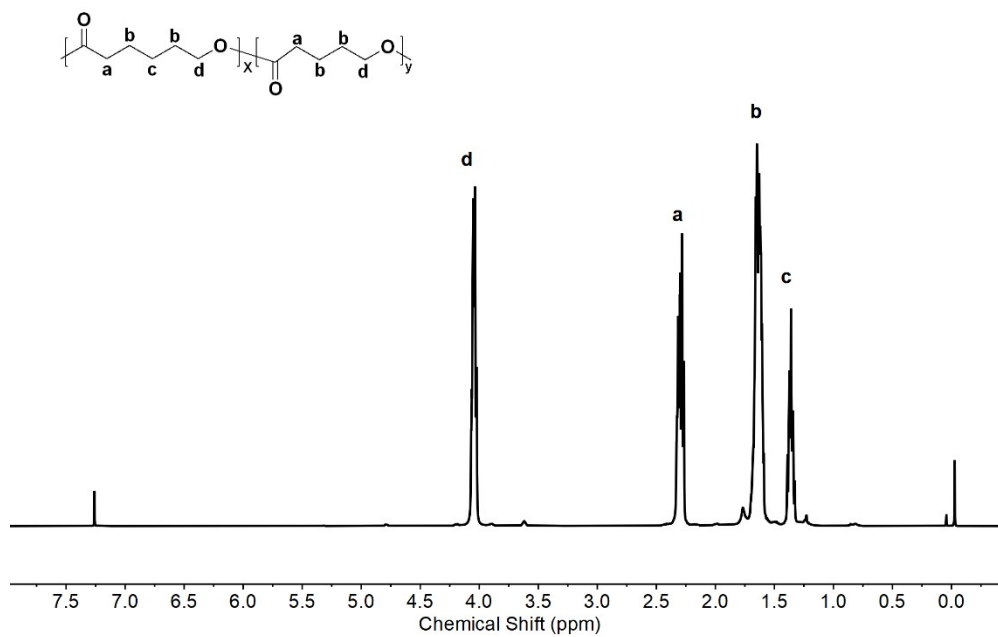

**Figure S34.**  $^1\text{H}$  NMR spectrum of copolymerization after purification. Conditions: catalyst **C3**,  $[\text{CHO}] = 0.3 \text{ mL}$ ,  $150 \text{ }^\circ\text{C}$ ,  $[\text{VL}]/[\text{CL}]/[\text{Cat.}] = 700:700:1$  (Table 3, entry 2).

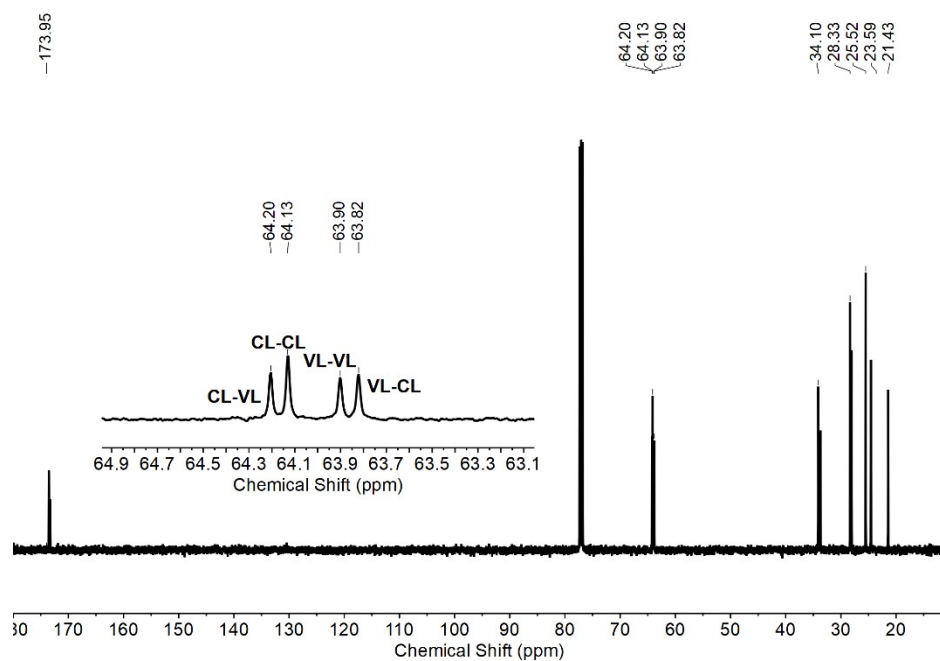

**Figure S35.**  $^{13}\text{C}$  NMR spectrum of copolymerization after purification. Conditions: catalyst **C3**,  $[\text{CHO}] = 0.3 \text{ mL}$ ,  $150 \text{ }^\circ\text{C}$ ,  $[\text{VL}]/[\text{CL}]/[\text{Cat.}] = 700:700:1$  (Table 3, entry 2).

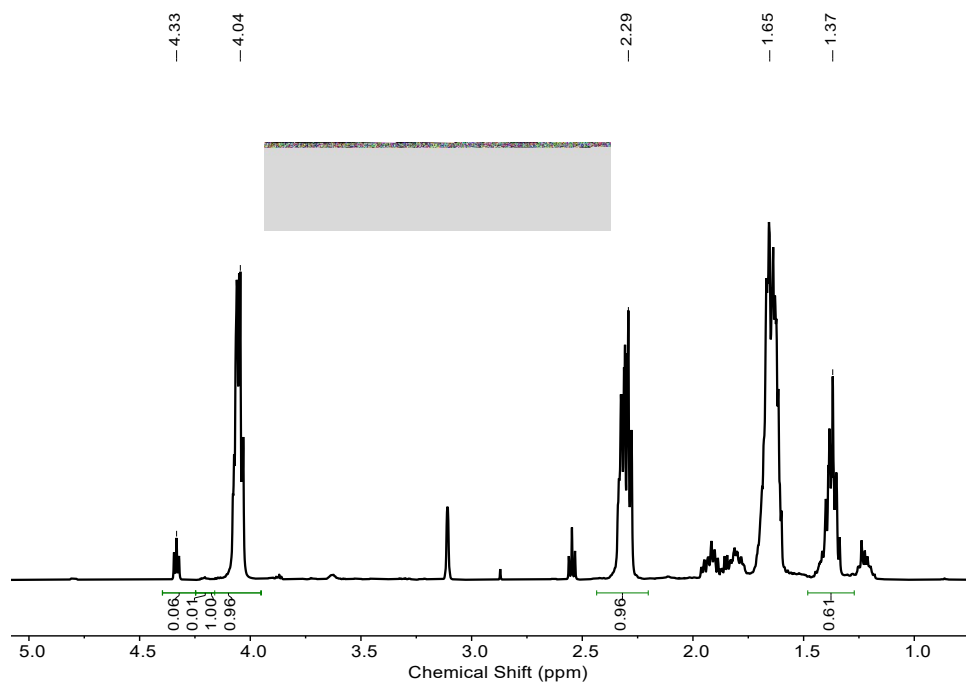

**Figure S36.**  $^1\text{H}$  NMR spectrum of copolymerization. Conditions: catalyst **C3**,  $[\text{CHO}] = 0.3 \text{ mL}$ ,  $180 \text{ }^\circ\text{C}$ ,  $[\text{VL}]/[\text{CL}]/[\text{Cat.}] = 700:700:1$  (Table 3, entry 3).

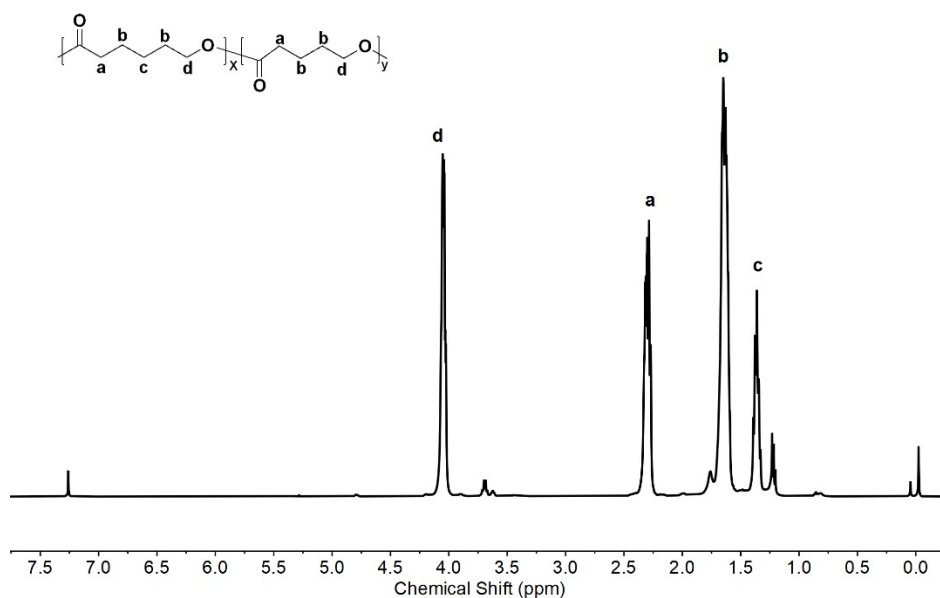

**Figure S37.**  $^1\text{H}$  NMR spectrum of copolymerization after purification. Conditions: catalyst **C3**,  $[\text{CHO}] = 0.3 \text{ mL}$ ,  $180 \text{ }^\circ\text{C}$ ,  $[\text{VL}]/[\text{CL}]/[\text{Cat.}] = 700:700:1$  (Table 3, entry 3).

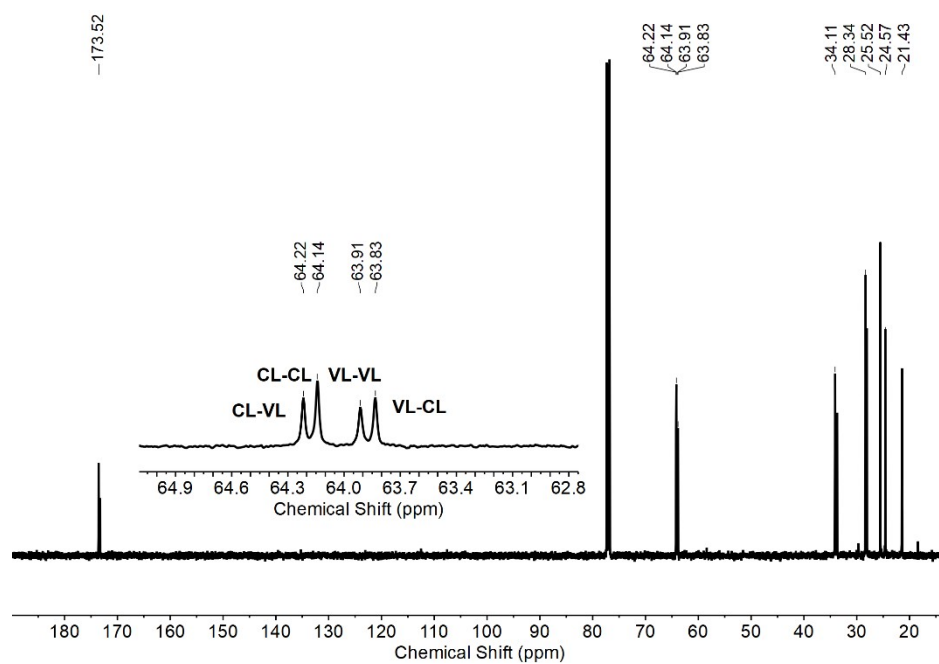

**Figure S38.**  $^{13}\text{C}$  NMR spectrum of copolymerization after purification. Conditions: catalyst **C3**,  $[\text{CHO}] = 0.3 \text{ mL}$ ,  $180 \text{ }^\circ\text{C}$ ,  $[\text{VL}]/[\text{CL}]/[\text{Cat.}] = 700:700:1$  (Table 3, entry 3).

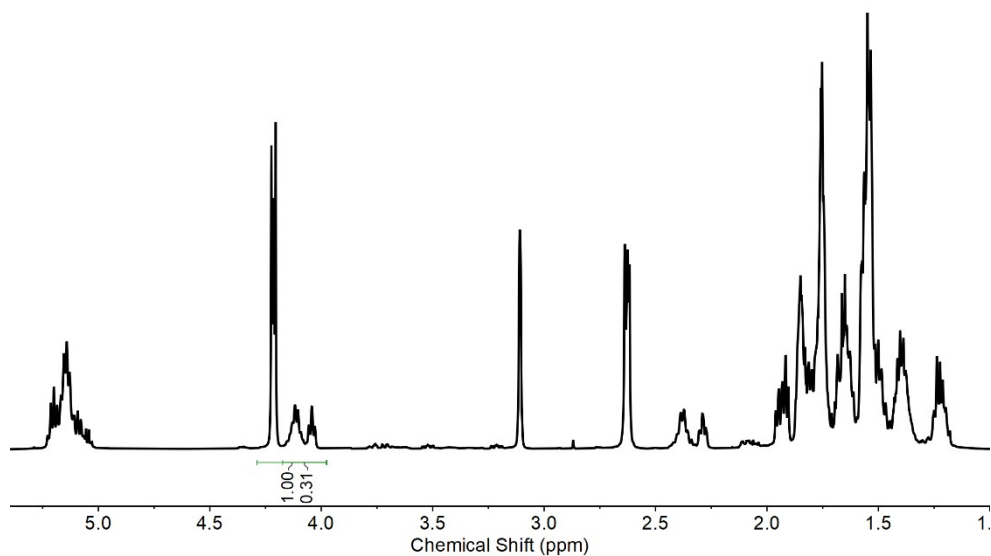

**Figure S39.**  $^1\text{H}$  NMR spectrum of copolymerization. Conditions: catalyst **C3**,  $[\text{CHO}] = 0.5 \text{ mL}$ ,  $150 \text{ }^\circ\text{C}$ ,  $[\text{CL}]/[\text{LA}]/[\text{Cat.}] = 1000:1000:1$  (Table 3, entry 4).

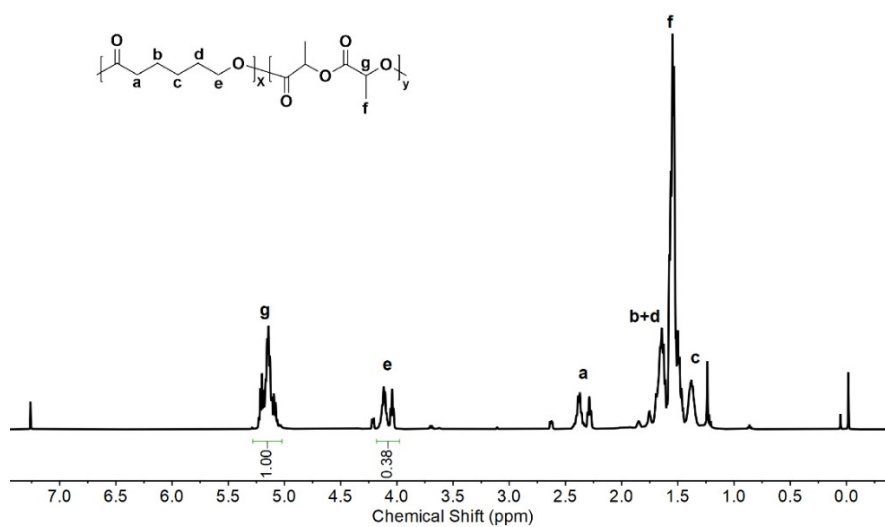

**Figure S40.**  $^1\text{H}$  NMR spectrum of copolymerization after purification. Conditions: catalyst **C3**,  $[\text{CHO}] = 0.5 \text{ mL}$ ,  $150 \text{ }^\circ\text{C}$ ,  $[\text{CL}]/[\text{LA}]/[\text{Cat.}] = 1000:1000:1$  (Table 3, entry 4).

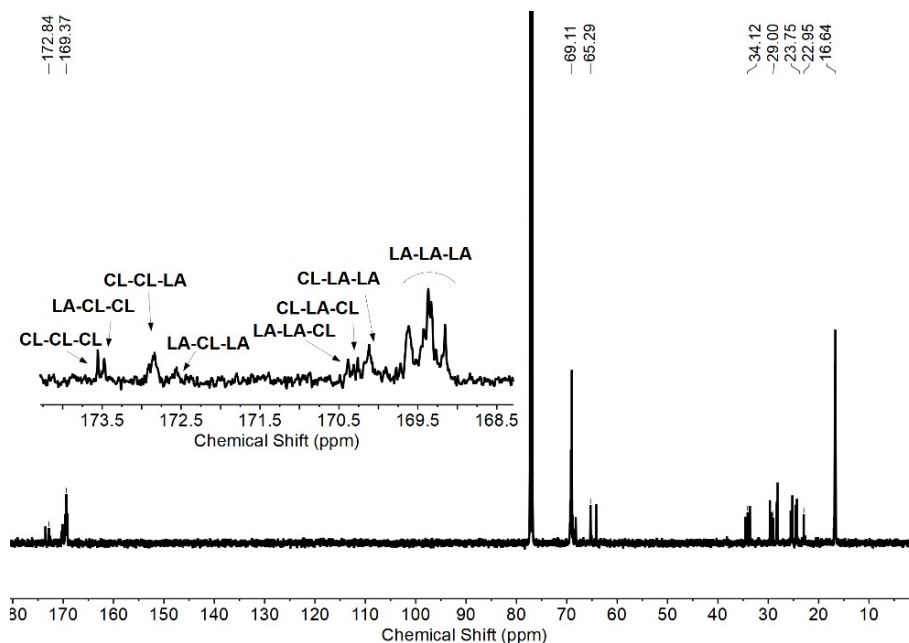

**Figure S41.**  $^{13}\text{C}$  NMR spectrum of copolymerization after purification. Conditions: catalyst **C3**,  $[\text{CHO}] = 0.5 \text{ mL}$ ,  $150 \text{ }^\circ\text{C}$ ,  $[\text{CL}]/[\text{LA}]/[\text{Cat.}] = 1000:1000:1$  (Table 3, entry 4).

Calculating the randomness of CL and LA copolymerization: the average sequence length ( $L$ ) and the randomness ( $R$ ) are calculated according to the following equations, where  $L_{\text{CL}}$  and  $L_{\text{LA}}$  represent the sequence lengths of CL and LA chain segments, respectively.<sup>7</sup>

$$L_{\text{CL}} = \frac{I_{\text{CCC}} + I_{\text{LCC}}}{I_{\text{CCL}} + I_{\text{LCL}}} \quad (\text{Eq. 4})$$

$$L_{\text{LA}} = \frac{1}{2} \left[ \frac{I_{\text{LLL}} + \frac{I_{\text{LLC}} + I_{\text{CLL}}}{2}}{I_{\text{LLC}} + I_{\text{CLL}}} + 1 \right] \frac{1}{\frac{I_{\text{LLC}} + I_{\text{CLL}}}{2} + I_{\text{CLC}}} \quad (\text{Eq. 5})$$

$$R = \frac{1}{L_{\text{CL}}} + \frac{1}{L_{\text{LA}}} \quad (\text{Eq. 6})$$

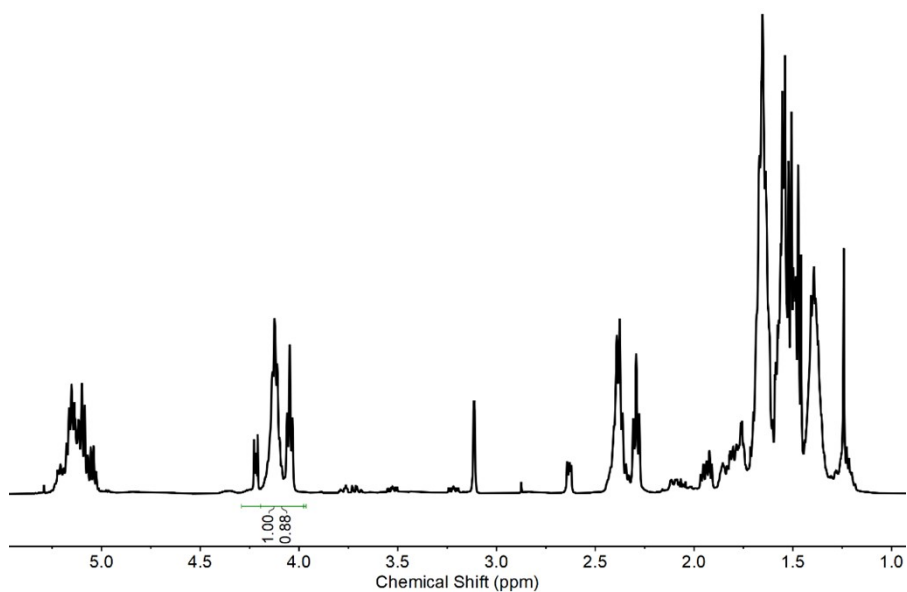

**Figure S42.**  $^1\text{H}$  NMR spectrum of copolymerization. Conditions: catalyst **C3**,  $[\text{CHO}] = 0.5 \text{ mL}$ ,  $180 \text{ }^\circ\text{C}$ ,  $[\text{CL}]/[\text{LA}]/[\text{Cat.}] = 1000:1000:1$  (Table 3, entry 5).

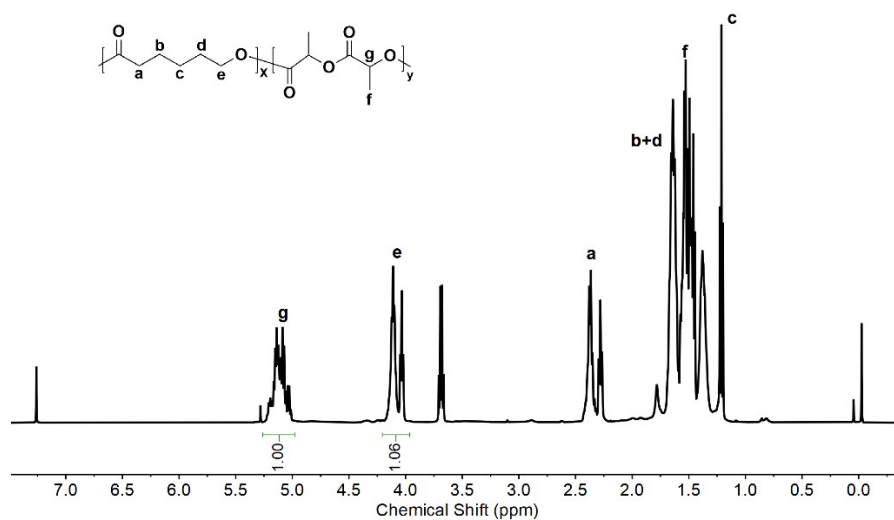

**Figure S43.**  $^1\text{H}$  NMR spectrum of copolymerization after purification. Conditions: catalyst **C3**,  $[\text{CHO}] = 0.5 \text{ mL}$ ,  $180 \text{ }^\circ\text{C}$ ,  $[\text{CL}]/[\text{LA}]/[\text{Cat.}] = 1000:1000:1$  (Table 3, entry 5).

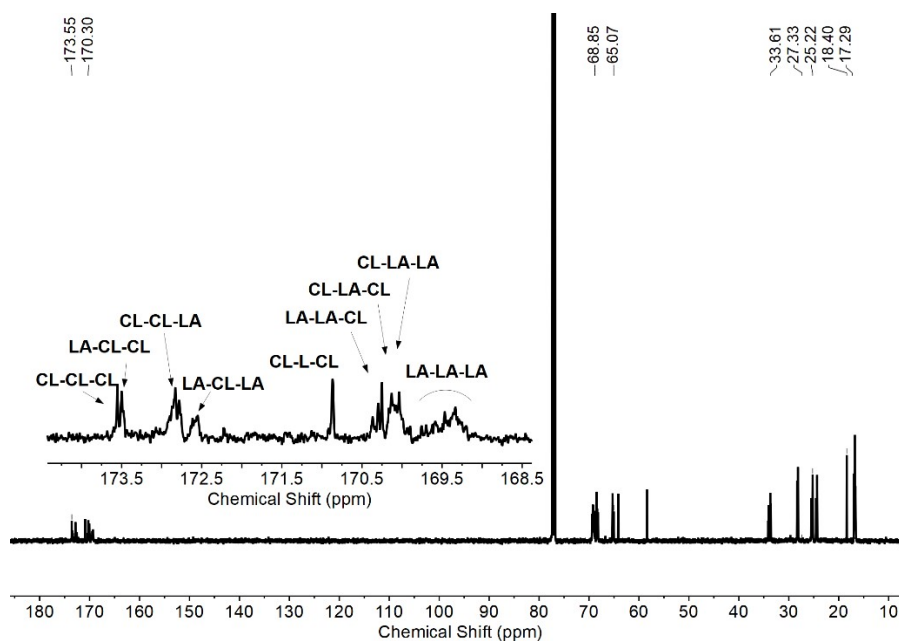

**Figure S44.**  $^{13}\text{C}$  NMR spectrum of copolymerization after purification. Conditions: catalyst **C3**,  $[\text{CHO}] = 0.5 \text{ mL}$ ,  $180 \text{ }^\circ\text{C}$ ,  $[\text{CL}]/[\text{LA}]/[\text{Cat.}] = 1000:1000:1$  (Table 3, entry 5).

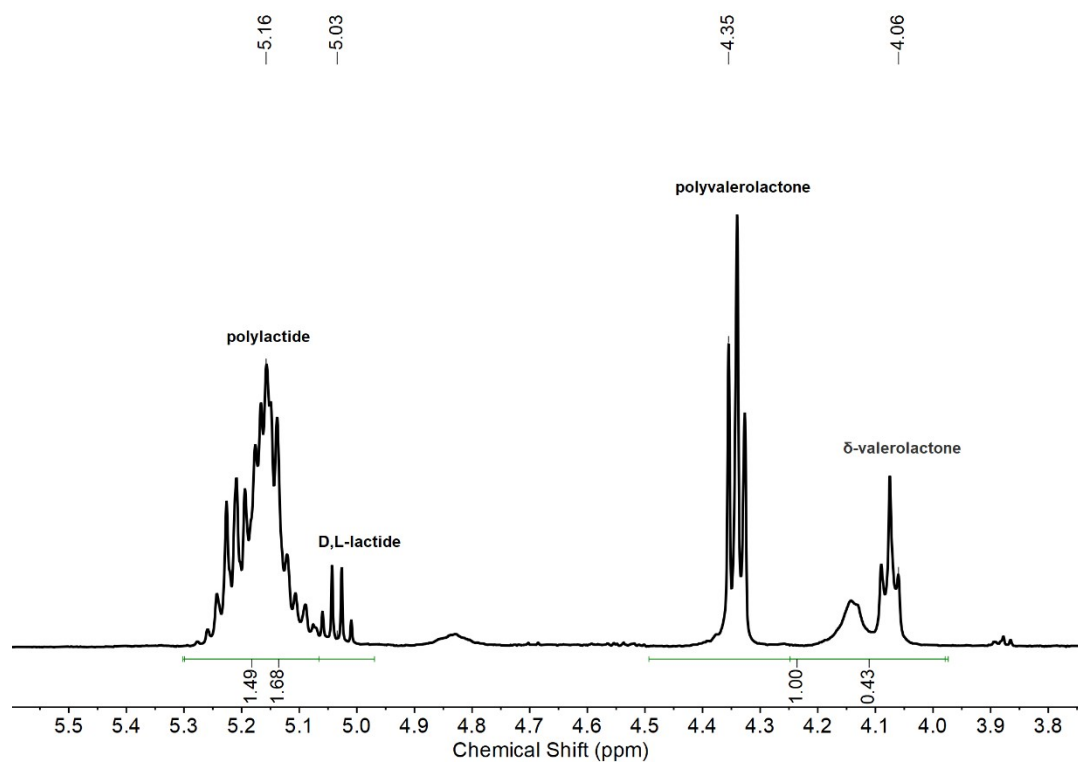

**Figure S45.**  $^1\text{H}$  NMR spectrum of copolymerization. Conditions: catalyst **C3**,  $[\text{CHO}] = 0.5 \text{ mL}$ ,  $150 \text{ }^\circ\text{C}$ ,  $[\text{VL}]/[\text{LA}]/[\text{Cat.}] = 700:1000:1$  (Table 3, entry 6).



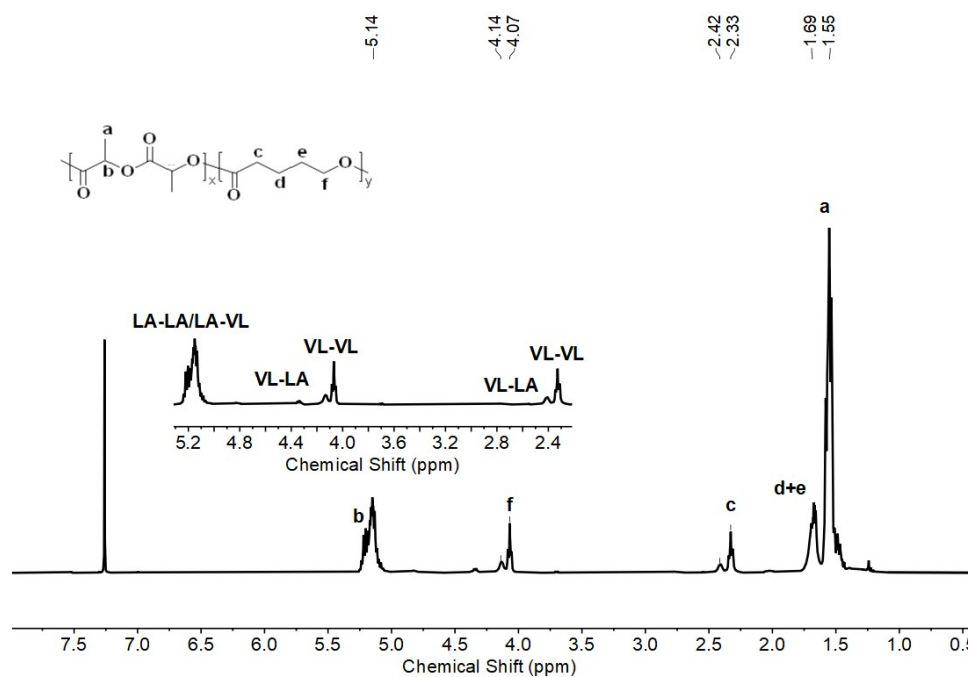

**Figure S46.** <sup>1</sup>H NMR spectrum of copolymerization after purification. Conditions: catalyst **C3**, [CHO] = 0.5 mL, 150 °C, [VL]/[LA]/[Cat.] = 700:1000:1 (Table 3, entry 6).

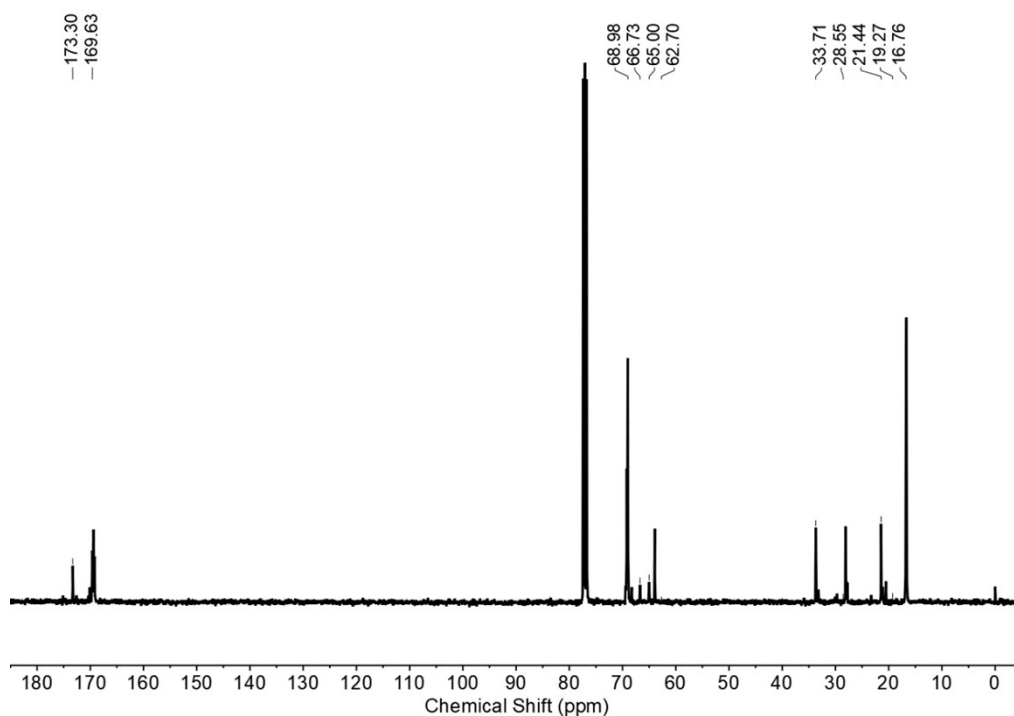

**Figure S47.** <sup>13</sup>C NMR spectrum of copolymerization after purification. Conditions: catalyst **C3**, [CHO] = 0.5 mL, 150 °C, [VL]/[LA]/[Cat.] = 700:1000:1 (Table 3, entry 6).

Calculating the randomness of VL and LA copolymerization: the average sequence length ( $L$ ) and the randomness ( $R$ ) are calculated according to the following equations,

where  $L_{VL}$  and  $L_{LA}$  represent the sequence lengths of VL and LA chain segments, respectively.<sup>8</sup>

$$L_{LA} = \frac{2LA}{VL - LA} \text{ (Eq. 7)}$$

$$L_{VL} = \frac{2VL}{VL - LA} \text{ (Eq. 8)}$$

$$R = \frac{1}{L_{LA}} + \frac{1}{L_{VL}} \text{ (Eq. 9)}$$

## 6. References

- (1) M. J. Frisch, G. W. Trucks, H. B. Schlegel, et al., Gaussian 16 Revision. A.03, Gaussian Inc., Wallingford, CT, 2016.
- (2) E. D. Glendening, A. E. Reed, J. E. Carpenter, F. Weinhold, NBO Version 3.1.
- (3) D. Domide, C. Neuhäuser, E. Kaifer, H. Wadepohl, H. J. Himmel, *Eur. J. Inorg. Chem.*, **2009**, 2170-2178.
- (4) A. Hermann, S. Hill, A. Metz, J. Heck, A. Hoffmann, L. Hartmann, S. Herres-Pawlis, *Angew. Chem. Int. Ed.*, **2020**, 59, 21778-21784.
- (5) M. Save, M. Schappacher, A. Soum, *Macromol. Chem. Phys.* **2002**, 203, 889–899.
- (6) Q. Hu, S.-Y. Jie, P. Braunstein, B.-G. Li, *Chin. J. Polym. Sci.*, **2019**, 38, 240-247.
- (7) I. D’Auria, V. Ferrara, C. Tedesco, W. Kretschmer, R. Kempe, C. Pellecchia, *ACS Appl. Polym. Mater.*, **2021**, 3, 4035-4043.
- (8) A. Sangroniz, L. Sangroniz, S. Hamzehlou, N. Aranburu, H. Sardon, J. R. Sarasua, M. Iriarte, J. R. Leiza, A. Etxeberria, *Polymers*, **2021**, 14, 52.
